# Supplementary material for: Qualitative, grounded theory exploration of patients’ experience of early mobilisation, rehabilitation and recovery after critical illness
Source: PubMed Central journal article supplement — BMJ Open. 2019 Feb 24;9(2):e026348. doi: 10.1136/bmjopen-2018-026348 (PMC6443050; doi:10.1136/bmjopen-2018-026348), 2019-02-24
Supplement: bmjopen-2018-026348.draft_revisions.pdf [file bmjopen-2018-026348.draft_revisions.pdf]

# BMJ Open

BMJ Open is committed to open peer review. As part of this commitment we make the peer review history of every article we publish publicly available.

When an article is published we post the peer reviewers' comments and the authors' responses online. We also post the versions of the paper that were used during peer review. These are the versions that the peer review comments apply to.

The versions of the paper that follow are the versions that were submitted during the peer review process. They are not the versions of record or the final published versions. They should not be cited or distributed as the published version of this manuscript.

BMJ Open is an open access journal and the full, final, typeset and author-corrected version of record of the manuscript is available on our site with no access controls, subscription charges or pay-per-view fees (<http://bmjopen.bmj.com>).

If you have any questions on BMJ Open's open peer review process please email [info.bmjopen@bmj.com](mailto:info.bmjopen@bmj.com)

# BMJ Open

## A Grounded Theory Exploration of Patients' Experience of Early Mobilisation, Rehabilitation and Recovery after Critical Illness.

|                               |                                                                                                                                                                                                                                                                                             |
|-------------------------------|---------------------------------------------------------------------------------------------------------------------------------------------------------------------------------------------------------------------------------------------------------------------------------------------|
| Journal:                      | <i>BMJ Open</i>                                                                                                                                                                                                                                                                             |
| Manuscript ID                 | bmjopen-2018-026348                                                                                                                                                                                                                                                                         |
| Article Type:                 | Research                                                                                                                                                                                                                                                                                    |
| Date Submitted by the Author: | 28-Aug-2018                                                                                                                                                                                                                                                                                 |
| Complete List of Authors:     | Corner, Evelyn; Brunel University Department of Clinical Sciences; The Royal Brompton and Harefield NHS Trust<br>Murray, Eleanor; University of Oxford Said Business School, Said Business School<br>Brett, Stephen; Imperial College Healthcare NHS Trust, Anaesthetics and Intensive Care |
| Keywords:                     | INTENSIVE & CRITICAL CARE, REHABILITATION MEDICINE, PATIENT EXPERIENCE, RECOVERY, PHYSIOTHERAPY                                                                                                                                                                                             |
|                               |                                                                                                                                                                                                                                                                                             |

SCHOLARONE™  
Manuscripts

**Title:** A Grounded Theory Exploration of Patients' Experience of Early Mobilisation, Rehabilitation and Recovery after Critical Illness.

**Authors:** Dr Evelyn J. Corner<sup>1,2,3</sup>, Dr Eleanor, J. Murray<sup>4</sup>, Professor Stephen J. Brett<sup>5,6</sup>

1. Department of Clinical Sciences, Brunel University London, UK. Phone number: +44 1895 268489
2. Chelsea and Westminster NHS Foundation Trust, London, UK
3. The Royal Brompton and Harefield NHS Foundation Trust, London, UK.
4. Saïd Business School, University of Oxford, Oxford, UK. Phone number: +44 (0)1865 614828
5. Department of Surgery and Cancer, Imperial College London, UK
6. Centre for Perioperative Medicine and Critical Care Research, Imperial College NHS Healthcare Trust, Hammersmith Hospital, London, UK. Phone number: +44 208 383 4521

**Corresponding author:**

Email: [evelyn.corner@brunel.ac.uk](mailto:evelyn.corner@brunel.ac.uk)

Phone number: +44 1895 268489

**Financial support:** This study was kindly funded by The Joint Research Committee at Chelsea and Westminster Hospital on behalf of a joint collaboration between the Chelsea and Westminster Medical School Research Trust (Registered Charity No. 247808) and Chelsea and Westminster Health Charity, and Brunel University London. EJM acknowledges the support of The Health Foundation. The views expressed are the authors' own and do not represent the views of The Health Foundation. SJB acknowledges the support of the National Institute for Health Research Imperial Biomedical Research Centre

1  
2  
3 **Competing interests:** No competing interests to declare.  
4  
5

6 **Authors contribution to the study:** EJC, SJB and EJM were involved in the methodological  
7  
8 design, data analysis and writing and reviewing the manuscript. EJC did all of the interviews  
9  
10 and data collection.  
11  
12

13  
14 **Patient and Public Involvement:** There was PPI involvement for the development of the  
15  
16 interview topic guide.  
17  
18

19  
20 **Word count: 4,021**  
21  
22  
23  
24  
25  
26  
27  
28  
29  
30  
31  
32  
33  
34  
35  
36  
37  
38  
39  
40  
41  
42  
43  
44  
45  
46  
47  
48  
49  
50  
51  
52  
53  
54  
55  
56  
57  
58  
59  
60

## Abstract

**Rationale:** Early rehabilitation of the critically ill patient is recognized best practice, however further work is needed to explore the patients' experience of rehabilitation qualitatively; a better understanding may facilitate implementation, and elucidate the journey of survivorship.

**Objectives:** To explore patient experience of early mobilisation and rehabilitation from critical illness.

**Design:** Exploratory grounded theory study using semi-structured interviews.

**Setting:** Participants were recruited from the adult medical/surgical ICU of a 430 bedded London teaching hospital. Interviews took place in the hospital or at the participants' home or work.

**Participants:** A purposive sample of adult critical care survivors.

**Analysis:** Data analysis followed a four stage constant comparison technique: open coding, axial coding, selective coding, and theory development, with the aim of reaching thematic saturation. Peer debriefing and triangulation through a patient support group were carried out to ensure credibility.

**Main results:** Fifteen people were interviewed (with four relatives in attendance).

Participants recounted a rehabilitation period characterized by episodic memory loss, hallucinations, weakness, and fatigue, which created a desire for paternalism, and made early rehabilitation difficult to recall, and arduous.

1  
2  
3 The central theory that emerged from this study was recalibration of the self. This is  
4  
5 driven by a lost sense of self, with loss of autonomy and competence; dehumanized  
6  
7 elements of care may contribute to this. Participants described a fractured life narrative  
8  
9 due to episodic memory loss, which meant that patients were shocked on awakening by  
10  
11 the discrepancy between their physical form and cognitive representation of  
12  
13 themselves; and an upturned vision of their future, impeding rehabilitation goal setting.  
14  
15  
16

17  
18 **Conclusions:** Recovery from critical illness is a complex process of emotional trauma;  
19  
20 and exploration of, and then adaptation to a new body as autonomy recovers. This can  
21  
22 impede early therapy goal setting. Rehabilitation plays a key role in recalibrating and  
23  
24 reconstructing a desirable future.  
25  
26  
27  
28  
29  
30  
31  
32  
33  
34  
35  
36  
37  
38  
39  
40  
41  
42  
43  
44  
45  
46  
47  
48  
49  
50  
51  
52  
53

54 **Key words:** critical care, rehabilitation, patient experience, recovery, physical therapy.  
55

56 **Abstract word count:** 299  
57  
58  
59  
60

### Strengths and Limitations of this study

1. This was an exploratory qualitative grounded theory study using semi structured interviews with survivors of critical illness to explore their experience of early mobilisation and rehabilitation after critical illness; the approach adopted, and the data generated provided an extremely rich source of individual experience with many consistent features.
2. A constant comparison technique of data analysis was used, and enrolment continued with the aim of thematic saturation.
3. Triangulation and peer debriefing were completed to ensure credibility of the study findings that clearly resonated with an independent group of critical illness survivors.
4. The patients were all recruited from one centre, which may limit transferability of findings. Qualitative studies of this kind innately have a small sample size; however the richness of the data produced allows deep exploration of meaning and theory development and thematic saturation was also reached.
5. The variation in time to interview may also be considered a limitation of this study, in view of impaired recall for longer gaps, however there was no notable difference in the richness of memories and insight provided by those interviewed at different time points; this also added an understanding of the process of recovery over time.

## Introduction:

The sequelae of critical illness are well documented; for some, rapid muscle wasting ensues<sup>1,2</sup>, which can lead to weakness and functional decline<sup>3</sup>; coupled with the cognitive consequences of delirium<sup>4</sup>, the result can be a prolonged period of weaning from mechanical ventilation, disability, reduced endurance, anxiety and depression<sup>5-9</sup>. To combat this, early mobilisation, minimising sedation and spontaneous breathing should be instigated early, with research demonstrating safety and likely efficacy<sup>10-13</sup>. Furthermore, on-going rehabilitation following discharge from critical care, and attendance at ICU follow up clinics are also advocated; although research showing direct benefit of these interventions is limited<sup>14-15</sup>.

Although implementation of early mobilisation protocols and post-ICU rehabilitation is inconsistent<sup>14,16-17</sup>, early adopters of these strategies are striving for them to become the norm<sup>12,13,18</sup>. In such centres, it is not uncommon for patients to receive active out of bed rehabilitation whilst receiving full mechanical ventilation, renal replacement therapy, and inotropic support<sup>18</sup>. Due to the severity of weakness that can be associated with prolonged critical illness, these rehabilitation sessions are often delivered by two or more therapists/nurses, and can require technical equipment and intimate handling. It is perhaps unsurprising that pain, fatigue, weakness, anxiety, fear, lack of motivation and patient confidence have been reported as barriers and reasons for cessation of early rehabilitation<sup>19, 20</sup>.

Sottile and colleagues (2015)<sup>21</sup> completed a survey of patient experience of early mobilisation in ICU; they concluded that patients recognized its importance, however found it difficult, tiring and uncomfortable.



1  
2  
3 In spite of current enthusiasm, there remains a clinical rationale for exploring the  
4  
5 experience of recovery from critical illness, focusing on physical rehabilitation during and  
6  
7 after a stay on ICU from the perspective of survivors in an in-depth manner. Thus this  
8  
9 paper reports the first study specifically to investigate early mobilisation from the  
10  
11 patient viewpoint.  
12  
13  
14  
15

16 **Aim:** To explore the patient experience of recovery from critical illness, with emphasis  
17  
18 on their experience of early mobilisation and rehabilitation; and to develop a theoretical  
19  
20 model grounded in these data.  
21  
22

23  
24 **Methods:**

25  
26  
27 **Qualitative approach and research paradigm:** Constructivist grounded theory study<sup>22</sup>  
28  
29 using semi-structured interviews with a purposive sample of adult ICU survivors.  
30  
31 Constructivism contends that individuals' views are directly influenced by their  
32  
33 experiences; and it is these individual experiences and views that shape their  
34  
35 perspective of reality. Constructivists believe that individuals have different realities that  
36  
37 will be influenced by context; this is a 'relativist' ontological stance<sup>22</sup>.  
38  
39  
40  
41  
42

43 **Setting:** Participants were recruited from the adult medical/surgical ICU of a 430 bedded  
44  
45 London teaching hospital between November 2015 and September 2016.  
46  
47

48  
49 **Participants and sampling:** Participants were purposively sampled. Screening and  
50  
51 inclusion criteria were: English speaking, a critical stay of +72 hours, capable of providing  
52  
53 informed consent determined using the Mental Capacity Act assessment<sup>23</sup>, anticipated  
54  
55 to survive, aged over 18 and documented intensive care unit acquired weakness (this  
56  
57 was to ensure that the participants had exposure to rehabilitation interventions.)  
58  
59  
60

1  
2  
3 Relatives were also invited to be present in the interview to enable exploration and  
4 elucidation of any ICU associated memory loss. As the study progressed participants  
5  
6 were selected to ensure a heterogeneous sample, with the aim of achieving thematic  
7  
8 saturation<sup>22,24-26</sup>.  
9  
10  
11  
12

13  
14 **Ethics:** This study was granted approval by the East of England Ethics committee (REC  
15  
16 reference number 14/EE/1027) and from the Research and Development Department at  
17  
18 the study site.  
19  
20

21  
22 **Data collection methods:** The clinical team identified potential participants against the  
23  
24 broad criteria to ensure that it was appropriate for them to be approached by the  
25  
26 research team. Notes were screened with the aim of purposively selecting a varied  
27  
28 sample of participants that could speak to the breadth of emerging themes. If  
29  
30 participants were appropriate they were approached by the lead researcher (EJC) and  
31  
32 provided with written information. If they had capacity to consent and agreed to  
33  
34 participate, written informed consent was gained. The semi-structured interviews were  
35  
36 conducted by EJC. For reflexivity, EJC is research physiotherapist with expertise in critical  
37  
38 care and prior training in qualitative methods research. EJC also has personal experience  
39  
40 of major injury and as a close relative of a critically ill patient.  
41  
42  
43  
44  
45  
46

47  
48 The interviews followed a topic guide designed with input from the Intensive Care  
49  
50 Society Patient and Relatives Group (Figure 1). The questions in the topic guide focused  
51  
52 on the memory of the admission to ICU, any physical weakness that they encountered,  
53  
54 and patients' experience of rehabilitation in the ICU and following discharge. The  
55  
56 questions were intentionally left open to initiate reflections and to allow subsequent  
57  
58 detailed exploration of the issues that appeared important to the interviewee. The first  
59  
60

1  
2  
3 interview was used as a pilot, however as no changes were made and those data  
4  
5 collected from this interview were rich and informative, it was retained and analysed in  
6  
7 the results.  
8  
9

10  
11 As the study progressed and themes emerged, participants were asked to elaborate and  
12  
13 probed on specific issues in line with the constant comparison technique. Namely; how  
14  
15 the perception of the physiotherapist's strength influenced their rehabilitation  
16  
17 experience; how they perceived their body now; what differences there were between  
18  
19 their current and previous physical function; how they saw their future; and what they  
20  
21 defined as rehabilitation.  
22  
23

24  
25  
26 The interviews were carried out either in the hospital or in the community after ICU  
27  
28 discharge. Enrolment and interviews continued until thematic saturation was reached  
29  
30 i.e. no new ideas were emerging, as per the criteria outlined by Bonde (2013)<sup>26</sup>, this was  
31  
32 to challenge the emergent theory and ensure credibility. The interviews were  
33  
34 anonymised, recorded and transcribed *verbatim*. All transcripts were double-checked for  
35  
36 accuracy by EJC.  
37  
38  
39

40  
41  
42 All interviewees were given pseudonyms to ensure anonymity. Further demographic and  
43  
44 clinical data were also collected from the case notes: age, critical care and hospital  
45  
46 length of stay, APACHE II score, admission diagnosis, residence prior to admission, pre-  
47  
48 morbid functional level, and hospital discharge destination.  
49  
50

51  
52  
53 **Data processing and analysis:** Transcripts were uploaded onto Nvivo® software (QSR  
54  
55 International, Doncaster, Australia) for analysis. They were read and reread by EJC to  
56  
57 ensure full immersion in the data. Memo writing was used throughout. The first stage of  
58  
59  
60

1  
2  
3 the analysis process is 'open coding', which is the identification of primary broad  
4  
5 categories; these may be around a theme or topic, or more conceptual, such as emotion  
6  
7 or attitude. The second stage is 'axial coding'; here categories are clustered together into  
8  
9 meaningful, related groups. The third stage is 'selective coding', where core themes are  
10  
11 identified. Lastly, the themes are used to generate a theoretical framework to explain  
12  
13 the data<sup>22,24-26</sup>. Data collection and analysis occur concurrently, so that constant  
14  
15 comparison was made between emerging themes (both within and between narratives),  
16  
17 and the literature, allowing theory refinement. After the fourth interview had been  
18  
19 transcribed and open coding had been completed, axial codes began to form. These  
20  
21 ideas were then discussed in detail with the research team. This was followed by a  
22  
23 dynamic process of reflection after each interview to develop and refine the axial codes  
24  
25 into selective codes until a theory encompassing all elements was developed. The last  
26  
27 interviews were used to challenge this theory and to assess for data saturation. This  
28  
29 process allowed a central phenomenon to emerge from the data<sup>22,24-26</sup>.  
30  
31  
32  
33  
34  
35  
36  
37

### 38 **Techniques to enhance trustworthiness:**

#### 39 **Peer debriefing:**

40  
41  
42 Peer debriefing was completed via in depth discussion with SJB and EJM. This was done  
43  
44 regularly throughout the course of the study.  
45  
46  
47  
48  
49

#### 50 **Triangulation:**

51  
52  
53 Triangulation and sense checking was completed through presentation to an ICU  
54  
55 survivor support group with subsequent dialogue to assess the dependability,  
56  
57 confirmability and credibility of the theory (this did not include interview participants).  
58  
59  
60

1  
2  
3 At the support group the theoretical framework was presented and then there was  
4 opportunity for questions and answers with the researcher (EJC). The group were then  
5 left to discuss the study between themselves and feedback to the research team with  
6 any thoughts at a later date to allow them to speak openly and frankly with each other.  
7  
8 The group lead fed back those participants resoundingly agreed with the concepts and  
9 felt that the work '*encompassed all the areas that were important and relevant to those  
10 who have experienced critical illness*'. The presentation also led to a very tearful  
11 response from some attendees who reported to have felt 'understood'.  
12  
13  
14  
15  
16  
17  
18  
19  
20  
21  
22

### 23 **Results:**

24  
25  
26  
27 Eleven hours of qualitative data from 15 participants (with 4 additional relatives present)  
28 were collected; the *patients* are described in Table 1.  
29  
30

31  
32  
33 *[Insert table 1: Patient demographics]*  
34  
35

36 The median ICU and hospital length of stay were 19 days (IQR 8-33) and 63 days (IQR 34-  
37 107) respectively. The median time between ICU discharge and interview was 56 days  
38 (IQR: 36-80). Ten (66.6%) of the interviews took place at the hospital whilst the patients  
39 were still inpatients, and five (33.3%) took place after discharge in the patient's home  
40 (n=2), work (n=1), or in a clinic room (n=2). The interviews lasted a median of 39  
41 minutes (IQR: 28-50).  
42  
43  
44  
45  
46  
47  
48  
49

50  
51 The central phenomenon grounded in these data was *recalibration of the self*. There  
52 were three themes contributing to this: *mental representation of prior self; current self,*  
53 *and construction of the future self*. The interaction between these themes and their  
54 contribution to the overall theory is displayed graphically in Figure 2.  
55  
56  
57  
58  
59  
60

1  
2  
3 When questioned about early physical function and mobilisation patients recalled a  
4 discrepancy at the time of recovering awareness between their *current self*, which  
5 incorporates their physical dependency, fatigue, clarity of mind, and self-image; and the  
6 mental representation of themselves, which is still consistent with their *preadmission*  
7 *self*. This discrepancy seemed due to episodic memory loss of their admission period.  
8  
9 Additionally, patients lacked some of the cognitive requirements for prospection at this  
10 point<sup>26</sup> and therefore they struggled to envisage a compelling future self. This appears to  
11 lead on to a period of *recalibration*.  
12  
13  
14  
15  
16  
17  
18  
19  
20  
21  
22

23 Although this central phenomenon of *recalibration* may seem distinct from the early  
24 rehabilitation experience which was the focus of this study, it was quite the opposite,  
25 with the process of *recalibration* seeming inextricably linked to the rehabilitation  
26 experience. Rehabilitation should push people physically, this helps patients to challenge  
27 and explore their current functional level, thereby reconciling the difference between  
28 their physical self and the cognitive image of themselves. The process of therapy goal  
29 setting also challenges their capacity to think about the future; discussing goal setting  
30 with participants therefore elucidated the difficulties they may have in constructing a  
31 compelling future to act as a motivational force.  
32  
33  
34  
35  
36  
37  
38  
39  
40  
41  
42  
43  
44  
45

46 The rationale and contributing themes are presented below. Supporting evidence is  
47 presented in Table 2.  
48  
49  
50

### 51 **Episodic memory loss**

52  
53  
54  
55 Fundamental to the patient experience of rehabilitation, and underpinning the  
56 theoretical interpretation was patients' episodic memory loss (i.e. loss of a specific  
57  
58  
59  
60

1  
2  
3 autobiographical event) of their admission to ICU, regardless of their admission  
4  
5 background or diagnosis. In some cases this memory gap lasted weeks, with some  
6  
7 participants unable to recall any rehabilitation sessions on ICU at all, citing their ward  
8  
9 rehabilitation sessions as their first experiences. The first clear memory *for all*  
10  
11 participants was a family member at the bedside. This frequently elicited a tearful  
12  
13 response, George: *"(my first memory on awakening) was my mother stroking my arm,*  
14  
15 *saying 'Mum's here'... that was some 30 days after my admission"*. This memory loss is  
16  
17 of paramount importance, as it made it difficult for participants to rationalise and  
18  
19 understand their current situation.  
20  
21  
22  
23  
24  
25

### 26 **Hallucinations and delusions**

27  
28  
29 All patients' experienced vivid hallucinations that often involved torture and trying to  
30  
31 escape; some however were pleasant experiences, such as a friendly dog in the ICU.  
32  
33 Those with a history of recreational drug use seemed less shocked by hallucinations and  
34  
35 able to rationalise their mental state, John: *"you're pumped full of so many drugs, it*  
36  
37 *doesn't surprise me that you're tripping out."* Perceived stigma influenced patients'  
38  
39 comfort in discussing hallucinations with staff, EJC: *"Did you tell anyone about the*  
40  
41 *hallucinations at the time?"* Tom: *"No... I just felt a bit silly"*.  
42  
43  
44  
45  
46  
47

### 48 **Weakness**

49  
50 On awakening patients reported frustration at their inability to communicate and were  
51  
52 shocked by the severity of their weakness, as mentally they still saw themselves as  
53  
54 capable of the physical tasks they were able to do pre-admission; Sasha: *"I didn't realise I*  
55  
56 *couldn't walk. I thought I could and I tried to get out of bed loads of times, but up here I*  
57  
58  
59  
60

1  
2  
3 was weak (legs) and the top of my arms were weak as well. I couldn't do it." Their actual  
4 physical-self and cognitive representation of themselves did not match, Sarah "I just  
5  
6 happened to catch sight of my whole body (in the mirror) and I nearly died. I thought;  
7  
8 'that doesn't resemble the person that I am'." However, it was the psychological  
9  
10 symptoms that were of the greatest concern to patients initially, Evan: "oh there were  
11  
12 tubes all over the place... but that was the least of my worries. The specialists were there,  
13  
14 and my son. I said 'I don't know who that is (son)'. My son came back on the Monday,  
15  
16 then I recognised him and things started falling back into place."  
17  
18  
19  
20  
21  
22

### 23 **"Noxious cycle" of ICU**

24  
25  
26  
27 Overwhelming fatigue, insomnia (due to noise and disruption), boredom and the  
28  
29 inability to concentrate were prevalent, which had a negative impact on the ability to  
30  
31 engage in both physical rehabilitation and cognitive tasks, and made many fear early  
32  
33 rehabilitation, John: "Physically tiring, emotionally, you're like "sh\*t, really? I've got to do  
34  
35 it (physiotherapy) now. I haven't got any energy at all." Procedural pain was reported in  
36  
37 only a few instances, but discomfort was problematic, for example, from being  
38  
39 'swaddled' in blankets (John). For many this seemed to form a "noxious cycle" (Figure 3).  
40  
41  
42  
43  
44

### 45 **Humanisation of care**

46  
47  
48 Participants' valued "humanised" care, often remembering the staff members who  
49  
50 made them laugh and feel safe, Caroline: "I remember one bloke, one nurse, who- he  
51  
52 would come in and smile, and I said 'Oh, you're always smiling. You make me so happy'."  
53  
54  
55 Trust in the clinical team was also important; if trust was compromised then it had a  
56  
57 negative impact on their engagement with rehabilitation. Trust seemed dependent on  
58  
59  
60



1  
2  
3 the rapport the staff member developed with the patient, including their ability to  
4  
5 communicate, honestly and to maintain patient's hope, Michelle: *"I trust him... because*  
6  
7 *when Tom (physiotherapist) says something, it's true. Everything he said was true."*

8  
9  
10 However, the staff patient interaction was not always positive, with many patients  
11  
12 describing examples of *de-humanised care*<sup>29</sup>. This included loss of agency: *"I feel so not*  
13  
14 *free, everyone is doing what they want, I'm like a puppet and I hate that"* (Michelle); and  
15  
16 feeling isolated: *"I don't think I had a voice at one point, which was probably one of the*  
17  
18 *most difficult things to experience, because you can't talk to people"* (Richard).  
19  
20  
21

22  
23 The physical attributes of staff also influenced patients' rehabilitation experience, if  
24  
25 physiotherapists looked small, young, and weak, then patients had less trust in their  
26  
27 physical ability to keep them safe during early mobilisation, David: *"He (the physio) was*  
28  
29 *strong of course. One admires that. It's an ability, you know; and of course, not*  
30  
31 *everybody's going to have that ability."*  
32  
33  
34  
35

### 36 **Recognising milestones to recovery and goal setting**

37  
38  
39 This vulnerability described by patients and relatives seemed to lead to a sense of  
40  
41 desired paternalism in the early days; they did not feel ready to be in control. This was  
42  
43 further perpetuated by a lack of understanding of the stages of recovery. Michelle; *"The*  
44  
45 *other day the whole ward congratulated me- and even now I feel embarrassed – because*  
46  
47 *I washed myself. I didn't wait until now to know how to wash myself; I thought it was so*  
48  
49 *stupid."* The memory loss of their admission meant that patients did not recall their  
50  
51 acute stages of illness, and hence their physical decline: the weakness that they were  
52  
53 experiencing did not make sense, and was often so severe that it made it difficult to  
54  
55 envisage the next steps in their recovery. As a result, patients did not always recognise  
56  
57  
58  
59  
60

1  
2  
3 basic functional tasks as rehabilitation or indeed their achievements as progress. Tom:  
4  
5 *“how you are improving may not be quite so obvious to the patient”*. Therapeutic  
6  
7 adjuncts, such as the use of a bed bike or tilt table, were more commonly recalled as  
8  
9 rehabilitation.  
10  
11

12  
13  
14 As patients had limited understanding of the recovery milestones early on, they wanted  
15  
16 the multi-disciplinary team to set their rehabilitation goals as...*“they did not know what*  
17  
18 *goals to set”* (Jim). Patient involvement in early goal setting was described as like *“being*  
19  
20 *in a car crash and someone asking you how you want to be cut out.”* Most patients had a  
21  
22 ‘just get on with it’ approach to rehabilitation. Martin: *“I just blind folded said, ‘if this is*  
23  
24 *what I am supposed to do, I will do it.”* However, despite desiring early clinician led  
25  
26 rehabilitation, all patients identified a high-level goal that aligned to the core values of  
27  
28 who they are, examples include, returning to work on oil rigs, going on holiday, finishing  
29  
30 a PhD, and getting married.  
31  
32  
33

34  
35  
36 As patients progressed through the stages of recovery, they started to recognise smaller  
37  
38 functional gains as improvement and engaged more in the goal-setting and  
39  
40 rehabilitation planning process, Sarah: *“Well, I was shocked at how little I could do, but*  
41  
42 *now, it's the other way, I'm actually shocked at how much I can do and I am doing. It's*  
43  
44 *really good.”* Their yardstick for comparison now became who they were on awakening,  
45  
46 and not who they were prior to admission; they were recalibrating.  
47  
48  
49

50  
51  
52 This is encapsulated in one key quote:  
53

54  
55 Ben: *“The first days when I couldn't move... I was disillusioned with the whole thing, and I*  
56  
57 *thought, ‘This is never going to work’... I couldn't see how anything could turn round, but*  
58  
59  
60

1  
2  
3 *I was told just to trust. But that period was very difficult because when you don't see any*  
4 *light at the end of the tunnel, it's difficult to sort of engage with it, and it's difficult to*  
5 *trust... There was plans in my head, but it's difficult to kind of have them if you think it's*  
6 *just a waste of time what you're doing. Now I know that there is (light at the end of the*  
7 *tunnel)... and I believe I'll be walking next week, they've (physiotherapists) let me believe*  
8 *that".*  
9  
10  
11  
12  
13  
14  
15  
16  
17

## 18 **Discussion**

21  
22 This work focused on exploring the experience of rehabilitation after critical illness,  
23 however as with inductive research, what transpired was a complex theory of recovery  
24 extending beyond the physical. Patients demonstrated an interruption to personal  
25 narrative, a lost sense of self associated with loss of autonomy, temporary desired  
26 paternalism and gave examples of accidental dehumanised care (albeit mostly non-  
27 maleficent in intent). Delirium, sleep deprivation, fatigue and memory loss acted as  
28 potent mediators between the patients' physical impairments, and their ability to  
29 recalibrate to their new disability, and engage in rehabilitation.  
30  
31  
32  
33  
34  
35  
36  
37  
38  
39  
40  
41

42 It is interesting to consider these findings in the context of established psychological  
43 theory. Deci & Ryan's Self-Determination Theory<sup>30,31</sup> attempts to explain why people  
44 engage in goal-orientated behaviour, exploring how this leads to well-being and personal  
45 growth. Its three core concepts are: *autonomy* (the ability to be in control of oneself),  
46 *competence* (the ability to manage the situation they are in) and *relatedness* (the ability  
47 to have an emotional connection with others). Only when these needs are met can  
48 intrinsic motivation flourish. Critical illness strips patients of *autonomy* and *competence*,  
49 and perhaps for a shorter period, *relatedness*. Critical care patients are unable to  
50  
51  
52  
53  
54  
55  
56  
57  
58  
59  
60

1  
2  
3 communicate, move, talk, make decisions, and may have hallucinations and be too  
4  
5 fatigued to engage in decision making. Hence, loss of *autonomy* and *competence* are key  
6  
7 features of the patient experience. *Relatedness* which may recover earlier (or be  
8  
9 encouraged) is of paramount importance to them, and was a motivator to engage in  
10  
11 rehabilitation.  
12  
13  
14

15  
16 Markus and Nurius (1986) developed a theory called “The Possible Self”<sup>32</sup>; they contend  
17  
18 that humans have different cognitive representations of who we are (*current self*) and  
19  
20 who we could be (*possible self*). *Possible selves* drive behaviour. A notion of the *possible*  
21  
22 *self* helps us to assess our *current self*; by creating a comparison for self-evaluation;  
23  
24 therefore this concept is innately linked with goal setting.  
25  
26  
27

28  
29 *The possible self* and goal setting also rely heavily on temporality, therefore requiring  
30  
31 narrative of the past, and the capacity to prospect. Physiologically, prospection depends  
32  
33 on episodic memory, prospective memory, emotional stability and hypothetical  
34  
35 thinking<sup>28</sup>; some of which can be impaired in critical illness due to sleep deprivation,  
36  
37 fatigue and delirium.  
38  
39  
40

41  
42 On awakening, patients’ immediate cognitive representation of their *current self*  
43  
44 matched their pre-admission self because they do not remember their functional  
45  
46 decline; however, their body had changed. Their mental image of their *current self* and  
47  
48 their *physical self* are not aligned. Furthermore, patients could not remember the  
49  
50 totality of their past, they did not recognise their present, and they struggled to  
51  
52 construct a compelling future self. This impaired their ability to engage in rehabilitation  
53  
54 goal setting and led to a sense of vulnerability, desired paternalism and emphasis on  
55  
56 *relatedness*.  
57  
58  
59  
60

1  
2  
3 This theory of *recalibration* ties these established psychological ideas together, reflecting  
4 the need for patients to explore their new self, adapt to it and allow it to become their  
5 new yardstick. When this was achieved, smaller milestones in recovery became  
6 meaningful goals. Others have described similar concepts as a *liminal* state. Liminality is  
7 an anthropological term from the Latin word *līmen*, meaning threshold<sup>33</sup>. It refers to  
8 someone who is transitioning. It is often associated with a change in role/identity; or a  
9 loss of one self, to be replaced with another. This can create inner turmoil, especially if  
10 that change is not invited.  
11  
12

13  
14  
15 This idea of liminality in ICU has been touched upon by a number of authors<sup>27,33-36</sup>. Kean  
16 and colleagues<sup>27</sup> identified 'unscheduled status passage' from *prior self* to *critically ill self*  
17 as a theme in a longitudinal study of ICU survivorship. They found that this unscheduled  
18 liminal stage is worsened by memory loss and delirium; and that this process of change  
19 is temporal in nature, both progressing and regressing (in the event of decline). In order  
20 to move on, patients need to regain autonomy.  
21  
22

23  
24  
25 Lindberg and colleagues<sup>35</sup> described what recovering autonomy looks like, suggesting  
26 that patients go through four stages; the first is to acknowledge their dependence (or  
27 paternalism), then they strive to be recognised as a person ("humanised" care). These  
28 two stages echo the findings of this study. The latter two stages are 'invited participation  
29 in care', and 'becoming a co-partner in the decision-making'. These stages describe how  
30 staff coach patients to take control again through mutual trust, understanding and co-  
31 determination.  
32  
33

34  
35  
36 Although these may seem like abstract concepts, it is the authors' view that they have  
37 direct relevance to clinical practice; especially as early rehabilitation becomes a key  
38  
39  
40  
41  
42  
43  
44  
45  
46  
47  
48  
49  
50  
51  
52  
53  
54  
55  
56  
57  
58  
59  
60

1  
2  
3 aspect of acute care. The reason for this is because perception of self and engagement  
4  
5 in rehabilitation and goal setting are inextricably linked<sup>26</sup>.  
6  
7

8  
9 If a person's mind is telling them one thing about who they are and what they are  
10  
11 capable of doing, and their body is telling them another, they cannot start thinking about  
12  
13 the future until they reconcile that difference. They cannot reconcile that difference with  
14  
15 delirium, hallucinations and lack of episodic memory to justify their current situation and  
16  
17 facilitate hypothetical thinking and prospection<sup>29</sup>.  
18  
19

20  
21  
22 Goal setting depends on the capacity to prospect; it is also a key recommendation in the  
23  
24 UK National Institute for Health and Care Excellence (NICE) Guidelines for Rehabilitation  
25  
26 after Critical Illness<sup>37</sup>, and NICE Quality Standards<sup>38</sup>. The Quality Standards state that  
27  
28 rehabilitation goals should be set within 4-days of admission, and ideally should be  
29  
30 patient agreed. These data would suggest that asking *patients* to set goals at day 4 may  
31  
32 for many be premature. Further research exploring the application of the model of  
33  
34 recovering autonomy described by Lindberg<sup>35</sup>, may assist in tailoring rehabilitation  
35  
36 guidelines to the specific needs of the critically ill.  
37  
38  
39  
40

41  
42 Further focus on *how* rehabilitation is delivered, not just *what* is delivered could also be  
43  
44 instructive. The impact of the dynamic between a sports coach and the players is well  
45  
46 known; yet this coaching dynamic is neglected somewhat in ICU rehabilitation. If  
47  
48 clinicians are able to assist patients in recalibrating to their *new current self*, and the  
49  
50 reconstruction of a compelling *future self*, it may improve patient care and outcome.  
51  
52  
53 Further research will be needed to confirm the concepts identified in this initial  
54  
55 exploratory study. However, we believe the concepts identified are sufficiently plausible  
56  
57  
58  
59  
60

1  
2  
3 and robust to pose challenges to clinicians working with recovering critically ill patients  
4  
5  
6 (outlined in Box 1).  
7  
8

9 **Box 1: Key observations and challenges to practice.**  
10

11 **Key observations**

- 12  
13 ❖ Patients recovering consciousness during or after a critical illness are likely to be  
14 shocked by the transition through which they have gone; part of that shock is the  
15 restoration of their autobiographical story after a largely unplanned interruption.  
16  
17 ➤ How can you help to fill the gaps in autobiographical memory?  
18  
19  
20  
21  
22 ❖ Patients' immediate memory is of who they were and what they were able to do  
23 before their critical illness; this is in collision with what they can actually do and a  
24 period of recalibration is needed to allow people to align the two and develop  
25 reasonable ambitions and goals.  
26  
27 ➤ How can you support patients to explore their current function and settle the  
28 discrepancy between expectations and reality?  
29  
30  
31  
32  
33  
34  
35 ❖ This recalibration is the development of an understanding of the relationships  
36 between their past, present and possible futures selves.  
37  
38 ➤ How can you help patients to envisage a compelling future?  
39  
40  
41  
42 ❖ Because of this need for recalibration along with delirium and impaired cognition  
43 patients may need, and wish for, very significant assistance in planning early  
44 rehabilitation; as autonomy recovers, so patients can become fully involved.  
45  
46 ➤ How can you recognise and support recovering autonomy?  
47  
48  
49  
50  
51 ❖ Motivation and engagement are crucial in maximising the benefits of rehabilitation;  
52 leveraging human relationships (relatedness) and encouraging autonomy are likely to  
53 be helpful, care that is de-humanising, even if "efficient" is likely to impair recovery.  
54  
55 ➤ How can humanisation of care be optimised in your ICU?  
56  
57  
58  
59  
60

1  
2  
3 **Acknowledgements:** Thanks to Dr Cherry Kilbride and Dr William Young (Brunel  
4  
5  
6 University London) for their input into the theoretical interpretation of these data.  
7  
8  
9  
10  
11  
12  
13  
14  
15  
16  
17  
18  
19  
20  
21  
22  
23  
24  
25  
26  
27  
28  
29  
30  
31  
32  
33  
34  
35  
36  
37  
38  
39  
40  
41  
42  
43  
44  
45  
46  
47  
48  
49  
50  
51  
52  
53  
54  
55  
56  
57  
58  
59  
60

For peer review only



**References:**

1. Puthuchearry ZA, Rawal, JR, McPhail M, Connolly B, Ratnayake G, Chan P, Hopkinson NS, Phadke R, Dew T, Sidhu PS, Velloso C, Seymour A, Agley CC, Selby A, Limb M, Edwards LM, Smith K, Rowlerson A, Rennie MJ, Moxham J, Harridge S, Hart N, Montgomery HE. Acute Skeletal Muscle Wasting in Critical Illness. *JAMA*, 2013; 310 (15), 1591-1600.
2. Friedrich O, Reid MB, Van den Berge G, Vanhorebeek I, Hermans G, Rich MM, Larsson L. The sick and the weak: Neuropathes/myopathies in the critically ill. *Physiol Rev*. 2015; 95 (3), 1025-109.
3. Hermans G, & Van den Berghe G. Clinical review: intensive care unit acquired weakness. *Crit Care*. 2015; 5 (19), 274.
4. Cavalazzi R, Saad M, Marik PE. Delirium in the ICU: an overview. *Ann Intensive Care*. 2012; 2 (49).
5. Kress JP & Hall JB. Intensive care unit acquired weakness and recovery from critical illness. *N Eng J Med*. 2014; 370, 1626-1635.
6. Cuthbertson BH, Elders A, Hall S, Taylor J, MacLennan G, MacKirdy F, Mackenzie SJ, and the Scottish Critical Care Trials Group and the Scottish Intensive Care Society Audit Group. Mortality and quality of life in the five years after severe sepsis. *Critical Care*. 2013; 17, R70.
7. Kaukonen K-M, Bailey M, Suzuki S, Pilcher D, Bellomo R. Mortality related to severe sepsis and septic shock among critically ill patients in Australia and New Zealand, 2000-2012. *JAMA*. 2014; 311 (13), 1308-1316.
8. Hill AD, Fowler RA, Pinot R, Herridge MS, Cuthbertson BH, Scales DC. Long-term outcomes and healthcare utilization following critical illness – a population-based study. *Critical Care*. 2016; 20, 76.
9. Pandharipande P, Girard TD, Jackson JC, Morandi A, Thompson JL, Pun NE, Brummel CG, Highes EE, Vasilevskis AK, Shintani KG, Moons SK, Geevaghese A, Canonico RO, Hopkins RO, Bernad GR, Dittus RS, Ely EW. Long-Term Cognitive Impairment after Critical Illness. *N Engl J Med*. 2013: 369, 1306-1316.
10. Nydahl P, Sricharoenchai T, Chandra S, Kundt FS, Huang M, Fischill M., Needham D.M. Safety of Patient Mobilization and Rehabilitation in the Intensive Care Unit.

- 1  
2  
3 Systematic Review with Meta-Analysis. *Annals of the American Thoracic Society*.  
4 2017; 14 (5).  
5  
6  
7 11. Castro-Avila AC, Seron P, Fan E, Gaete M, Mickan S. (2015) Effect of early  
8 rehabilitation during Intensive Care Unit stay on functional status: systematic review  
9 and meta-analysis. *PLoS ONE*. 2015; 10 (7), e0130722.  
10  
11 12. Balas MC, Burke WJ, Gannon D, Cohen MZ, Colburn L, Bevil C, Franz D, Olsen KM, Ely  
12 WE, Vasilevski EE (2013) Implementing the awakening and breathing coordination,  
13 delirium monitoring/management, and early exercise/mobility bundle into everyday  
14 care: opportunities, challenges, and lessons learned from implementing the ICU  
15 pain, agitation and delirium guidelines. *Crit Care Med*. 2013; 41: S116-S127.  
16  
17 13. Balas MC, Vasilevskis EE, Olsen KM, Schmid KK, Shostrum V, Cohen MZ, Peitz G,  
18 Gannon DE, Sisson J, Sullivan J, Stohtert JC, Lazure J, Nuss SL, Jawa RS, Freihurt F, Ely  
19 EW, Burke WJ. (2014) Effectiveness and safety of the awakening and breathing  
20 coordination, delirium monitoring/management, and early exercise/mobility bundle.  
21 *Crit Care Med*. 2014; 42:1024-1036.  
22  
23 14. Connolly B, Douiri A, Steier J, Moxham J, Denehy L, Hart N. A UK survey of  
24 rehabilitation following critical illness: implementation of NICE Clinical Guidance 83  
25 (CG83) following hospital discharge. *BMJ Open*. 2014; 4; e004963.  
26  
27 15. Jensen JF, Thomsen T, Overgaard D, Bestle MH, Christensen D, Egerod I. Impact of  
28 follow-up consultations for ICU survivors on post-ICU syndrome: a systematic review  
29 and meta-analysis. *Intensive Care Med* (2015) 41:763–775  
30  
31 16. Nydahl P, Parker RA, Bartoszek G, Dubb R, Filipovic,S, Flohr H-J, Kaltwasser A, Mende  
32 H, Rothaug O, Schuchhardt D, Schwabbauer N, Needham D. Early Mobilization of  
33 Mechanically Ventilated Patients: A 1-Day Point-Prevalence Study in Germany.  
34 *Critical Care Medicine*. 2014; 42 (5), 1178-1186.  
35  
36 17. Berney SC, Rose JW, Bernhardt J, Denehy L, Prospective observation of physical  
37 activity in critically ill patients who were intubated for more than 48 hours. *Journal*  
38 *of Critical Care*. 2015; 30(4), 658-663.  
39  
40 18. Hodgson CL, Stiller K. Needham D, Tipping CJ, Harrold M, Baldwin CE, Bradley S,  
41 Berney S, Caruana LR, Elliott D, Green M, Haines K, Higgins AM, Kaukonen KM,  
42 Leditschke IA, Nickels MR, Paratz J, Patman S, Skinner EH, Young PJ, Zanni JM,  
43 Denehy L, Webb SA. Expert consensus and recommendations on safety criteria for  
44  
45  
46  
47  
48  
49  
50  
51  
52  
53  
54  
55  
56  
57  
58  
59  
60

- 1  
2  
3 active mobilisation of mechanically ventilated critically ill patients. *Critical Care*.  
4 2014; 16:658.  
5  
6  
7 19. Parry S, Knight LD, Connolly B, Baldwin C, Puthuchery Z, Morris P, Mortimore J, Hart  
8 N, Denehy L, Granger CL. Factors influencing physical activity and rehabilitation in  
9 survivors of critical illness: a systematic review of quantitative and qualitative  
10 studies. *Intensive Care Med*. 2017; 43, 531–542.  
11  
12  
13 20. Wright SE, Thomas K, Watson G, Baker C, Bryant A, Chadwick, TJ, Shen J, Wood R,  
14 Wilkinson J, Mansfield L, Stafford V, Wade C, Furneal J, Henderson A, Hugill K,  
15 Howard P, Roy A, Bonner S, Baudouin S. Intensive versus standard physical  
16 rehabilitation therapy in the critically ill (EPICC); a multicentre, parallel-group,  
17 randomised controlled trial. *Thorax*. 2017; (5).  
18  
19  
20 21. Sottile PD, Nordon-Craft A, Malone D, Schenkman M, Moss M. Patient and family  
21 perceptions of physical therapy in the medical intensive care unit. *Journal of Critical*  
22 *Care*. 2015; 30, 891-895.  
23  
24 22. Mills, J., Bonner, A., Francis, K. (2006) The development of constructivist grounded  
25 theory. *International Journal of Qualitative Research Methods*. 5 (1).  
26  
27 23. Mental Capacity Act (2005). UK legislation. Available at:  
28 <https://www.legislation.gov.uk/ukpga/2005/9/contents>  
29  
30 24. Corbin, J. & Strauss, A. (2015) *Basics of qualitative research: techniques and*  
31 *procedures for developing grounded theory*. 4th edition. London  
32  
33 25. Heath H, Cowley S. Developing a grounded theory approach: a comparison of Glaser  
34 and Straus. *International Journal of Nursing Studies*. 2004; 41, 141-150.  
35  
36 26. Bonde, D. (2013) *Qualitative Interviews: When enough is enough*. Research by  
37 Design.  
38  
39 27. Kean S, Salisbury LG, Rattray J, Walsh TS, Huby G, Ramsey, P. 'Intensive Care Unit  
40 (ICU) Survivorship' – a constructivist grounded theory of surviving critical illness.  
41 *Journal of Clinical Nursing*. 2017. [online].  
42  
43 28. Osman M. What are the essential cognitive requirements for prospection (thinking  
44 about the future)? *Frontiers in Psychology*. 2014;5, 626.  
45  
46 29. Todres L, Galvin KT, Holloway I. The humanisation of healthcare: a value framework  
47 for qualitative research. *International Journal of Qualitative Studies on Health and*  
48 *Well-being*. 2009; 4, 68-77.  
49  
50  
51  
52  
53  
54  
55  
56  
57  
58  
59  
60

- 1  
2  
3 30. Deci EL, Ryan RM. Intrinsic motivation and self-determination in human behavior.  
4 New York, NY: Plenum. 1985.  
5  
6  
7 31. Deci EL, Ryan RM. (2017) <http://selfdeterminationtheory.org/theory/> (Accessed:  
8 30th March 2017)  
9  
10 32. Markus H & Nurius P. Possible Selves. *American Psychologist*. 1986; 41 (9), 954-969  
11  
12 33. Johnston LB. Surviving Critical Illness: A Case Study in Ambiguity. *Journal of Social*  
13 *Work in End-of-Life & Palliative Care*. 2011; 7 (4), 363-382.  
14  
15 34. Darbyshire JL, Greig PR, Vollaam S, Young DJ, Hinton L. "I Can Remember Sort of Vivid  
16 People... but to Me They Were Plasticine." Delusions on the Intensive Care Unit:  
17 What Do Patients Think is Going on? *PLoS ONW*; 11 (4): e0153775.  
18  
19 35. Lindberg C, Sivberg B, Willman A, Fagerstrom C. A trajectory towards partnership in  
20 care – patients perspective of autonomy in intensive care: A qualitative study.  
21 *Intensive and Critical Care Nursing*. 2015;31: 294-302.  
22  
23 36. Craig A, Tran Y, Middleton J. (2017) Chapter Three: Theory Of Adjustment Following  
24 Severe Neurological Injury: evidence Supporting The Spinal Cord Injury Adjustment  
25 Model. *Horizons*. In: Andres Costa, A & Villalba, E. (eds) *Neuroscience Research*.  
26 Volume 29. Nova Science Publishers, Inc., New York.  
27  
28 37. National Institute for Health and Clinical Excellence. Great Britain. *Rehabilitation*  
29 *After Critical Illness Great Britain*. Available at: [www.nice.org.uk](http://www.nice.org.uk). 2009.  
30  
31 38. National Institute for Health and Clinical Excellence (2017). *Rehabilitation after*  
32 *Critical illness in adults: Quality Standard*. Published 7th September 2017. Available  
33 online: [nice.org.uk/guidance/qs158](http://nice.org.uk/guidance/qs158). (Accessed: 13th September 2017)  
34  
35  
36  
37  
38  
39  
40  
41  
42  
43  
44  
45  
46  
47  
48  
49  
50  
51  
52  
53  
54  
55  
56  
57  
58  
59  
60

**Table 1:** Summary of each participant

| Pseudonym (male/female [M/F]) | Relative present? | APACHE II | Diagnosis                                           | Length of stay, ICU (days) | Length of stay, hospital (days) | Discharge location                                         |
|-------------------------------|-------------------|-----------|-----------------------------------------------------|----------------------------|---------------------------------|------------------------------------------------------------|
| Richard (M)                   | No                | 17        | Acute porphyria                                     | 9                          | 102                             | Long-term, inpatient rehabilitation                        |
| Martin (M)                    | No                | 14        | Drug overdose, aspiration pneumonia, rhabdomyolysis | 26                         | 32                              | Home, outpatient rehabilitation                            |
| Sadiq (M)                     | No                | 22        | Exacerbation of COPD                                | 33                         | 34                              | Home, full care package                                    |
| Sarah (F)                     | No                | 24        | Open hernia repair- post operative MOF              | 115                        | 197                             | Long-term, inpatient rehabilitation                        |
| Tom (M)                       | No                | 10        | Pneumonia and pulmonary embolism                    | 10                         | 16                              | Home, outpatient rehabilitation                            |
| Evan (M)                      | No                | 15        | Acute bowel obstruction- colon cancer               | 5                          | 48                              | Home, no rehabilitation.                                   |
| Sasha (F)                     | Yes, daughter     | 10        | Neuromyelitis optica                                | 19                         | 98                              | Long-term, inpatient rehabilitation                        |
| John (M)                      | No                | 27        | Influenza                                           | 33                         | 71                              | Long-term, inpatient rehabilitation                        |
| George (M)                    | No                | 12        | Drug overdose- respiratory failure                  | 25                         | 36                              | Home, no rehabilitation                                    |
| Michelle (F)                  | No                | 14        | Exacerbation of COPD                                | 6                          | 42                              | Declined inpatient rehabilitation- home, full care package |
| Jim (M)                       | Yes, wife         | 11        | Food poisoning- MOF                                 | 10                         | 18                              | Home, no rehabilitation                                    |
| Matthew (M)                   | No                | 18        | Hospital acquired pneumonia- fractured NOF          | 5                          | 178                             | Nursing home                                               |
| Caroline (F)                  | Yes, husband      | 22        | Anterior resection for bowel cancer                 | 13                         | 63                              | Short-stay, inpatient rehabilitation.                      |
| Ben (M)                       | No                | 15        | Drug overdose                                       | 65                         | 107                             | Home, care package                                         |
| David (M)                     | Yes, wife present | 21        | Influenza                                           | 150                        | 232                             | Long-term, inpatient rehabilitation                        |

(NOF-neck of femur; MOF-multi-organ failure; COPD-chronic obstructive pulmonary disease)

**Table 2:** Supporting data

| <b>Recalibration of the self</b> |                                                                                                                                                                                                                                                                                                                                                                                                                                                                                                                                                                                                                                                                                                                                                                                                                                                                                          |
|----------------------------------|------------------------------------------------------------------------------------------------------------------------------------------------------------------------------------------------------------------------------------------------------------------------------------------------------------------------------------------------------------------------------------------------------------------------------------------------------------------------------------------------------------------------------------------------------------------------------------------------------------------------------------------------------------------------------------------------------------------------------------------------------------------------------------------------------------------------------------------------------------------------------------------|
| <b>Interruption in memory</b>    | <p><b>ICU admission</b></p> <p>Sasha: "...that's when I don't know, it's a real black after that (the emergency room)"</p> <p>Sadiq: "That is a black. That is a blank. Totally blank"</p> <p>John: "I must have been in and out of consciousness, because I don't remember anything"</p> <p>Ben: "I had a bad fall, collapsed... that's all I remember"</p> <hr/> <p><b>Rehabilitation and mobilization</b></p> <p>EJC: "what was your memory of getting moving after you woke up with the tubes attached?" Ben: "I don't really have much memory of it."</p> <p>EJC: Do you remember any of the rehab on ICU?" Martin: "Not to start with, no."</p> <p>David: "It was Dan (ward physiotherapist) who taught me to sit on the edge of the bed."</p> <p>EJC: "Do you remember getting into the chair for the first time?" Michelle: "It was with Tom (the ward physical therapist)."</p> |
| <b>Hallucinations</b>            | <p>John: "I kept thinking I could see like people with hoodies and they were like assassins, trying to get in."</p> <p>David: "I was taken into Soho (Central London) by some people and stuck under a glass floor, lying under a glass floor with formaldehyde around me. I was encased."</p> <p>Ben: "I operated on Margaret Thatchers cat and there was eight other people in the house and three of them got shot... I remember waking up with the fear that I was going to get shot."</p> <p>Carolyn: "I was trying to use my mobile (to escape), and the same number kept on pressing and I remember panicking"</p>                                                                                                                                                                                                                                                                |
| <b>Weakness</b>                  | <p>George: "Nothing, I couldn't move my hand. I couldn't move and that was really scary. Really scary."</p> <p>Richard: "I couldn't do anything. I was paralyzed from the neck down... I still felt like I had sensation in my legs and my arms, I just couldn't move them."</p> <p>Carolyn: "I couldn't even stand up. I was really very, very weak."</p> <p>John: "I couldn't do anything. I mean literally, I couldn't move, I could just barely</p>                                                                                                                                                                                                                                                                                                                                                                                                                                  |

|                                                    |                                                                                                                                                                                                                                                                                                                                                                                                                                                                                                                                                                                                                                                                                                                                                                                                            |
|----------------------------------------------------|------------------------------------------------------------------------------------------------------------------------------------------------------------------------------------------------------------------------------------------------------------------------------------------------------------------------------------------------------------------------------------------------------------------------------------------------------------------------------------------------------------------------------------------------------------------------------------------------------------------------------------------------------------------------------------------------------------------------------------------------------------------------------------------------------------|
|                                                    | <p>move my fingers.”</p> <p>David: “I couldn’t move. I couldn’t move at all. I could blink, that’s about it.”</p> <p>Martin: “...couldn’t walk, couldn’t do nothing.”</p>                                                                                                                                                                                                                                                                                                                                                                                                                                                                                                                                                                                                                                  |
| <p><b>Noxious cycle of ICU</b></p>                 | <p>Sarah: “I didn’t want to do it (physiotherapy). I used to dread them coming, any excuse to get out of it. I was just so tired.”</p> <p>John: “Physically tiring, emotionally... you’re like ‘sh*t really? I’ve got to do it (mobilization) now? I haven’t got any energy at all.”</p> <p>George: “There were some days when they’d (physiotherapist) come and they’d get me into the chair, and they’d want to do some work on the zimmer frame. They’d come back (from getting the zimmer frame) and I’d be asleep.”</p> <p>Sarah: “People kept telling me to read, but I couldn’t. I couldn’t’ actually physically read. They’d bring me the menu and I just couldn’t do it, and then I’d fall asleep”</p>                                                                                            |
| <p><b>Relatedness</b></p>                          | <p>Researcher: “What have been the things that have kept you going?” Sasha: “I think Gemma (daughter) and her dad, they’ve been so supportive. He’s been down every day, and Gemma sometimes twice a day *starts crying* ... sorry...I suppose if it wasn’t for them, I wouldn’t be... *crying- unable to finish sentence*</p> <p>Sarah: “I cry a lot...something helped me to keep going, an inner strength came...the kids...”</p> <p>Richard: “Obviously I was doing it (rehab) for me primarily, but knowing how much concern and love she has for me, and knowing how much it would mean to her and how much of a relief it would be to her... The fact that she was, you know with me for as long as she was, and as strong as she was... I don’t know. I never thought my mum was that strong.”</p> |
| <p><b>Loss of autonomy and competence</b></p>      | <p>Richard: “You are reliant entirely on the people around you, for everything really... that’s difficult.”</p> <p>Sarah: “...then I just accepted it (weakness), going...on the hoist and, you lose all dignity when you’re in that state you just accept it, and you just let them help you as much as possible and when you’ve done your, you know bits of physio, exhausted, you go back to bed again, sleep again. You know it tended to be like that.”</p>                                                                                                                                                                                                                                                                                                                                           |
| <p><b>Recovery milestones and goal setting</b></p> | <p>Matthew: “Let the patient realize that he is not capable of doing that, or this, or whatever... don’t tell him”</p> <p>Tom: “Everyone’s functions, and how they are improving, might not be quite so obvious to the patient.”</p>                                                                                                                                                                                                                                                                                                                                                                                                                                                                                                                                                                       |

|                                                                                      |                                                                                                                                                                                                                                                                                                                                                                                                                                                                                                                                                                                                         |
|--------------------------------------------------------------------------------------|---------------------------------------------------------------------------------------------------------------------------------------------------------------------------------------------------------------------------------------------------------------------------------------------------------------------------------------------------------------------------------------------------------------------------------------------------------------------------------------------------------------------------------------------------------------------------------------------------------|
|                                                                                      | <p>Carolyn: "The other day the whole ward congratulated me- and even now I feel embarrassed – because I washed myself. I didn't wait until now to know how to wash myself; I thought it was so stupid."</p> <p>Jim's wife: "We didn't want to set the goals, because we didn't know what goals to set"</p> <p>Sadiq:"It depends on the person. If a person is shooting to the high, they might do it (achieve their goal), but sometimes shooting too much to the high might break your neck. If they are too sick, they cannot talk, you are in the dark and you have to put your own objectives."</p> |
| <p><b>Conflict between current self and cognitive representation of the self</b></p> | <p>Sasha: "I didn't realize I couldn't walk. I thought I could and I tried to get out of bed loads of times, but up here I was weak (legs) and the top of my arms were weak as well. I couldn't do it."</p> <p>Sarah: "I don't ever look at myself in the mirror and there is a mirror in that bathroom, I just happened to catch sight of my whole body almost and I nearly died. I thought; that doesn't resemble the person that I am."</p>                                                                                                                                                          |



1  
2  
3 Figure legends  
4  
5

6 **Figure 1: Interview topic guide**  
7

8 **Figure 2: Recalibration of the self:** A theory of rehabilitation and recovery from critical illness. This  
9 figure demonstrates the how prior physical appearance and ability, and autobiographical memory  
10 feed into a patient's mental representation of their prior self on ICU awakening. However, the  
11 current physical self differs- this is informed by symptoms of weakness, fatigue, hallucinations,  
12 delirium, and loss of autonomy and competence. Episodic memory loss creates a divide between  
13 these two selves (represented by the two way arrow). Recalibration is when the physical self and the  
14 cognitive self align. This process of recalibration is facilitated by reconstruction of the future self.  
15  
16  
17

18 **Figure 3: The noxious cycle of critical illness.**  
19  
20  
21  
22  
23  
24  
25  
26  
27  
28  
29  
30  
31  
32  
33  
34  
35  
36  
37  
38  
39  
40  
41  
42  
43  
44  
45  
46  
47  
48  
49  
50  
51  
52  
53  
54  
55  
56  
57  
58  
59  
60

Figure 1: Interview topic guide

|                                                                                                                                                                                                                                                                                                                                                                                                                                                                                                                                                                                                                                                                                                                                                                                                                                                                                                                                                                                                                                                                                     |
|-------------------------------------------------------------------------------------------------------------------------------------------------------------------------------------------------------------------------------------------------------------------------------------------------------------------------------------------------------------------------------------------------------------------------------------------------------------------------------------------------------------------------------------------------------------------------------------------------------------------------------------------------------------------------------------------------------------------------------------------------------------------------------------------------------------------------------------------------------------------------------------------------------------------------------------------------------------------------------------------------------------------------------------------------------------------------------------|
| <p><b>Topic guide</b></p> <p><b>Opening</b></p> <p>1. Introduction</p> <p>2. Consent confirmed.</p> <p><b>Questions</b></p> <p>3. Do you have any questions about the about the patient information sheet?</p> <p>4. Could you tell me about the events leading up to your admission to the ICU?</p> <p>5. Could you summarize, as you remember it, your stay on the ICU including the length of your stay and the procedures you experienced (e.g. surgery, tracheostomy etc)?</p> <p>6. Could you describe any physical problems that you had during and after your stay, such as weakness, pain, joint stiffness etc?</p> <p>7. Could you describe your rehabilitation experience?</p> <ul style="list-style-type: none"><li>- Memories of rehabilitation</li><li>- Rehabilitation equipment</li><li>- Interaction with the therapist</li><li>- Intensity of rehabilitation</li><li>- Rehabilitation goal setting</li></ul> <p><b>Closing</b></p> <p>8. Do you have any additional information you would like to add?</p> <p>9. Do you have any questions?</p> <p><b>End</b></p> |
|-------------------------------------------------------------------------------------------------------------------------------------------------------------------------------------------------------------------------------------------------------------------------------------------------------------------------------------------------------------------------------------------------------------------------------------------------------------------------------------------------------------------------------------------------------------------------------------------------------------------------------------------------------------------------------------------------------------------------------------------------------------------------------------------------------------------------------------------------------------------------------------------------------------------------------------------------------------------------------------------------------------------------------------------------------------------------------------|

# Reconstruction of the future self

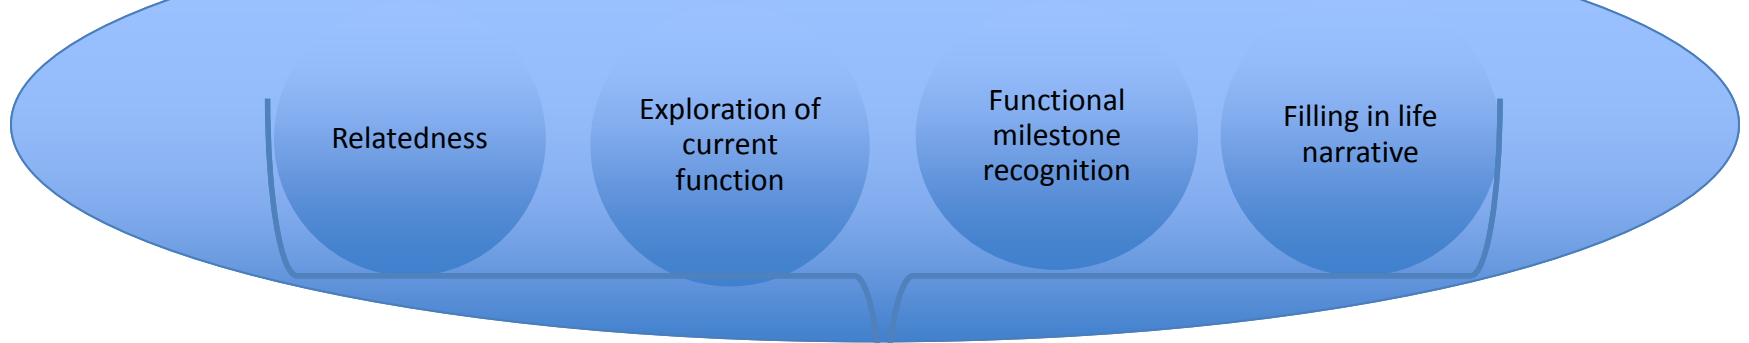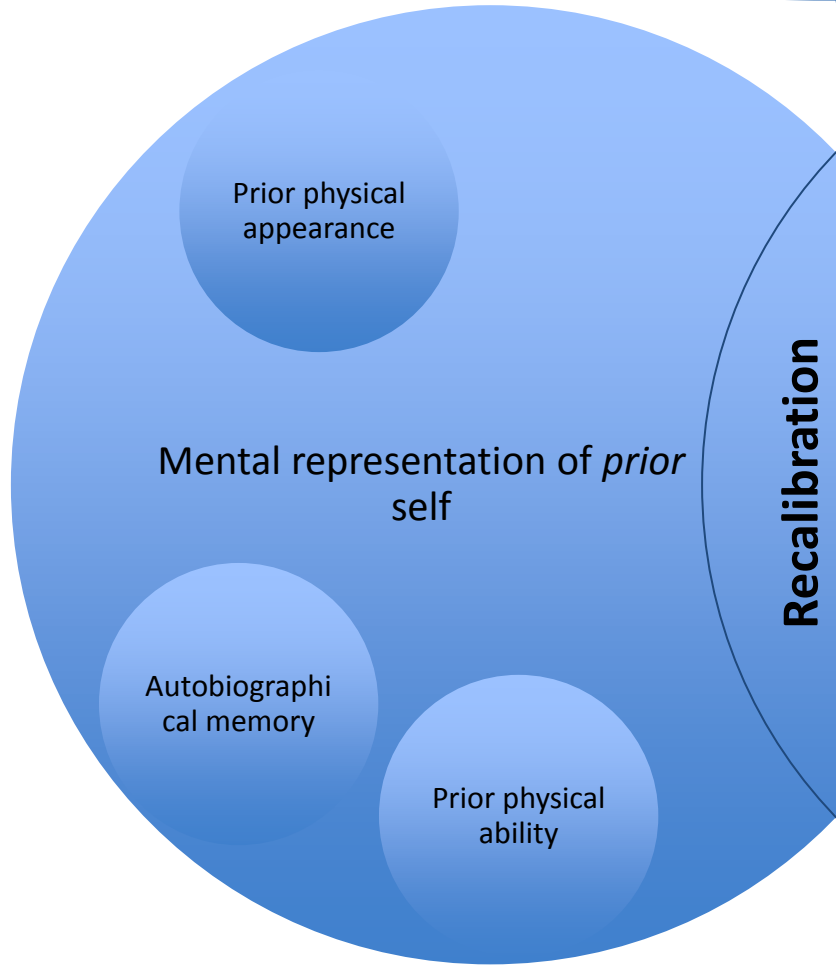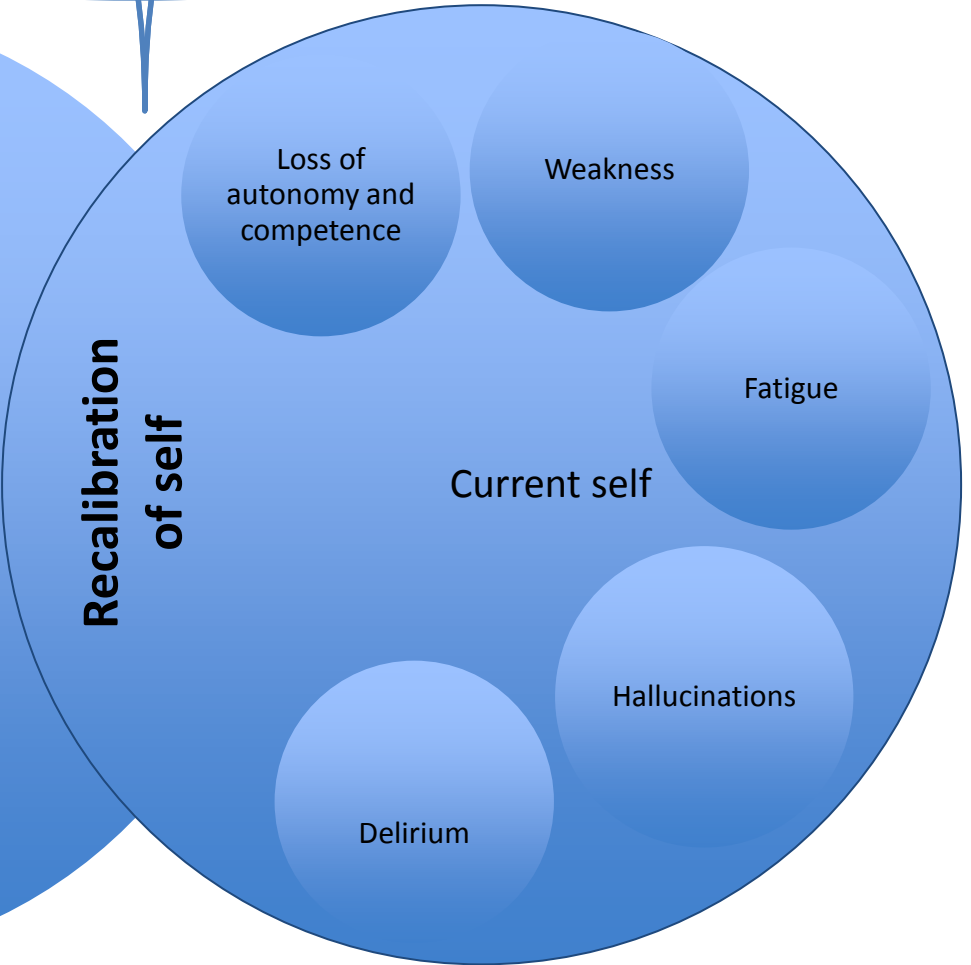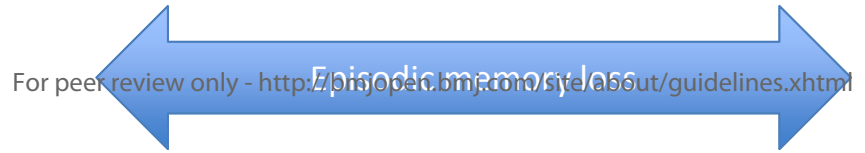

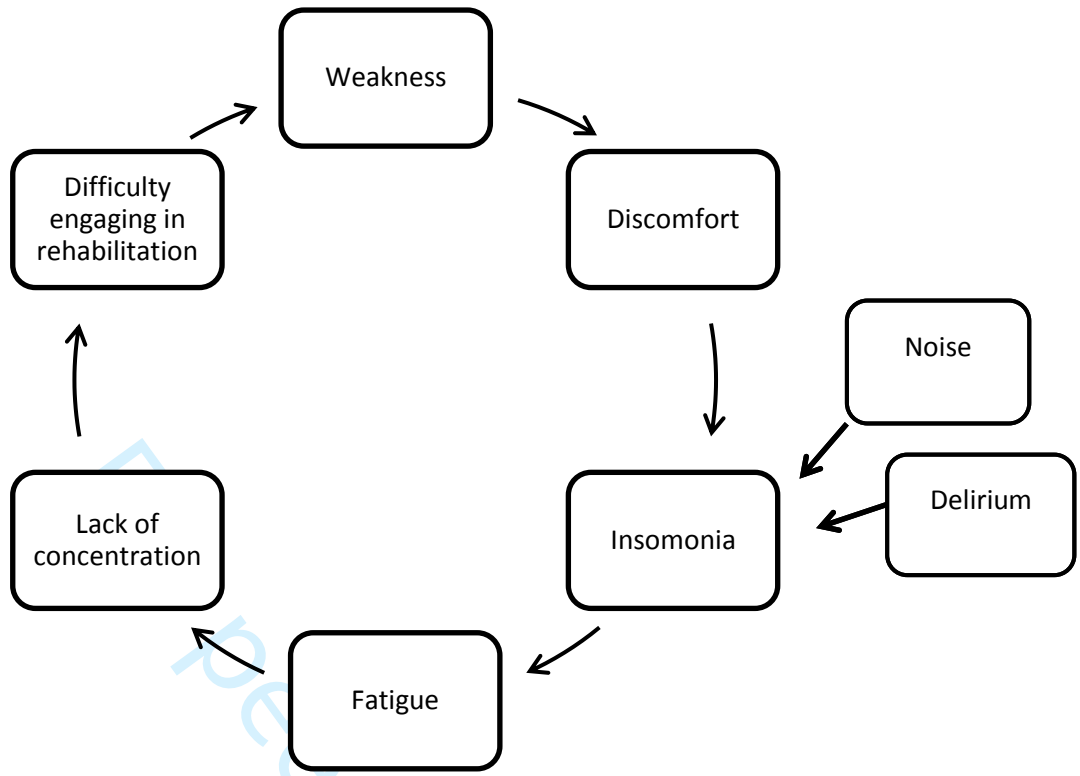

**Figure 3:** Noxious cycle of ICU

1  
2  
3  
4  
5  
6  
7  
8  
9  
10  
11  
12  
13  
14  
15  
16  
17  
18  
19  
20  
21  
22  
23  
24  
25  
26  
27  
28  
29  
30  
31  
32  
33  
34  
35  
36  
37  
38  
39  
40  
41  
42  
43  
44  
45  
46  
47  
48  
49  
50  
51  
52  
53  
54  
55  
56  
57  
58  
59  
60

# BMJ Open

## A Qualitative, Grounded Theory Exploration of Patients' Experience of Early Mobilisation, Rehabilitation and Recovery after Critical Illness.

|                                 |                                                                                                                                                                                                                                                                                                                                                       |
|---------------------------------|-------------------------------------------------------------------------------------------------------------------------------------------------------------------------------------------------------------------------------------------------------------------------------------------------------------------------------------------------------|
| Journal:                        | <i>BMJ Open</i>                                                                                                                                                                                                                                                                                                                                       |
| Manuscript ID                   | bmjopen-2018-026348.R1                                                                                                                                                                                                                                                                                                                                |
| Article Type:                   | Research                                                                                                                                                                                                                                                                                                                                              |
| Date Submitted by the Author:   | 29-Oct-2018                                                                                                                                                                                                                                                                                                                                           |
| Complete List of Authors:       | Corner, Evelyn; Brunel University Department of Clinical Sciences; The Royal Brompton and Harefield NHS Trust<br>Murray, Eleanor; University of Oxford Said Business School, Said Business School<br>Brett, Stephen; Imperial College London Department of Surgery and Cancer; Imperial College Healthcare NHS Trust, Anaesthetics and Intensive Care |
| <b>Primary Subject Heading</b>: | Intensive care                                                                                                                                                                                                                                                                                                                                        |
| Secondary Subject Heading:      | Rehabilitation medicine, Qualitative research                                                                                                                                                                                                                                                                                                         |
| Keywords:                       | INTENSIVE & CRITICAL CARE, REHABILITATION MEDICINE, PATIENT EXPERIENCE, RECOVERY, PHYSIOTHERAPY                                                                                                                                                                                                                                                       |
|                                 |                                                                                                                                                                                                                                                                                                                                                       |

SCHOLARONE™  
Manuscripts

**Title:** A Qualitative, Grounded Theory Exploration of Patients' Experience of Early Mobilisation, Rehabilitation and Recovery after Critical Illness.

**Authors:** Dr Evelyn J. Corner<sup>1,2,3</sup>, Dr Eleanor J. Murray<sup>4</sup>, Professor Stephen J. Brett<sup>5,6</sup>

1. Department of Clinical Sciences, Brunel University London, UK. Phone number: +44 1895 268489
2. Chelsea and Westminster NHS Foundation Trust, London, UK
3. The Royal Brompton and Harefield NHS Foundation Trust, London, UK.
4. Saïd Business School, University of Oxford, Oxford, UK. Phone number: +44 (0)1865 614828
5. Department of Surgery and Cancer, Imperial College London, UK
6. Centre for Perioperative Medicine and Critical Care Research, Imperial College NHS Healthcare Trust, Hammersmith Hospital, London, UK. Phone number: +44 208 383 4521

**Corresponding author:**

Email: [evelyn.corner@brunel.ac.uk](mailto:evelyn.corner@brunel.ac.uk)

Phone number: +44 1895 268489

**Financial support:** This study was kindly funded by The Joint Research Committee at Chelsea and Westminster Hospital on behalf of a joint collaboration between the Chelsea and Westminster Medical School Research Trust (Registered Charity No. 247808) and Chelsea and Westminster Health Charity, and Brunel University London. EJM acknowledges the support of The Health Foundation. The views expressed are the authors' own and do not represent the

1  
2  
3 views of The Health Foundation. SJB acknowledges the support of the National Institute for  
4  
5 Health Research Imperial Biomedical Research Centre  
6  
7

8  
9 **Competing interests:** No competing interests to declare.  
10

11  
12 **Authors contribution to the study:** EJC, SJB and EJM were involved in the methodological  
13  
14 design, data analysis and writing and reviewing the manuscript. EJC did all of the interviews and  
15  
16 data collection.  
17  
18

19  
20 **Data sharing statement:** All available data can be obtained by contacting the corresponding  
21  
22 author.  
23  
24

25  
26 **Word count: 4,479**  
27  
28  
29  
30  
31  
32  
33  
34  
35  
36  
37  
38  
39  
40  
41  
42  
43  
44  
45  
46  
47  
48  
49  
50  
51  
52  
53  
54  
55  
56  
57  
58  
59  
60

## Abstract

**Rationale:** Physical rehabilitation (encompassing early mobilisation) of the critically ill patient is recognized best practice, however further work is needed to explore the patients' experience of rehabilitation qualitatively; a better understanding may facilitate implementation of early rehabilitation, and elucidate the journey of survivorship.

**Objectives:** To explore patient experience of physical rehabilitation from critical illness during and after a stay on ICU.

**Design:** Exploratory grounded theory study using semi-structured interviews.

**Setting:** Adult medical/surgical ICU of a London teaching hospital.

**Participants:** A purposive sample of ICU survivors with intensive care unit acquired weakness (ICUAW) and an ICU length of stay of >72 hours.

**Analysis:** Data analysis followed a four-stage constant comparison technique: open coding, axial coding, selective coding, and model development, with the aim of reaching thematic saturation. Peer debriefing and triangulation through a patient support group were carried out to ensure credibility.

**Main results:** Fifteen people were interviewed (with four relatives in attendance). The early rehabilitation period was characterized by episodic memory loss, hallucinations, weakness, and fatigue, making early rehabilitation arduous and difficult to recall. Participants craved a paternalised approach to care in the early days of ICU.



1  
2  
3 The central idea that emerged from this study was recalibration of the self. This is driven by  
4  
5 a lost sense of self, with loss of autonomy and competence; dehumanized elements of care  
6  
7 may contribute to this. Participants described a fractured life narrative due to episodic  
8  
9 memory loss, meaning that patients were shocked on awakening from sedation by the  
10  
11 discrepancy between their physical form and cognitive representation of themselves.  
12  
13  
14  
15

16 **Conclusions:** Recovery from ICUAW is a complex process that often begins with survivors  
17  
18 exploring and adapting to a new body, followed by a period of recovering autonomy.  
19  
20 Rehabilitation plays a key role in this recalibration period, helping survivors to reconstruct a  
21  
22 desirable future.  
23  
24  
25  
26  
27  
28  
29  
30  
31  
32  
33  
34  
35  
36  
37  
38  
39  
40  
41  
42  
43  
44  
45  
46  
47  
48  
49  
50  
51  
52  
53  
54  
55  
56  
57  
58  
59  
60

1  
2  
3 **Key words:** critical care, early mobilisation, rehabilitation, patient experience, recovery,  
4 physical therapy.  
5

6  
7 **Abstract word count:** 298  
8  
9  
10  
11  
12

### 13 **Strengths and Limitations of this study**

14

- 15  
16  
17 1. This was an exploratory qualitative grounded theory study using semi structured  
18 interviews with survivors of critical illness to explore their experience of physical  
19 rehabilitation after critical illness; the approach adopted, and the data generated  
20 provided an extremely rich source of individual experience with many consistent  
21 features.  
22  
23
- 24 2. A constant comparison technique of data analysis was used, and enrolment  
25 continued until thematic saturation was reached.  
26  
27
- 28 3. Triangulation and peer debriefing were completed to ensure credibility of the  
29 study findings that clearly resonated with an independent group of critical illness  
30 survivors.  
31  
32
- 33 4. The patients were all recruited from one centre, which may limit transferability  
34 of findings. Qualitative studies of this kind innately have a small sample size,  
35 however, the richness of the data produced allows deep exploration of meaning  
36 and model development and thematic saturation was also reached.  
37  
38
- 39 5. The variation in time to interview may be considered a limitation of this study in  
40 view of impaired recall for longer gaps, however, there was no notable  
41 difference in the richness of memories and insight provided by those interviewed  
42  
43  
44  
45  
46  
47  
48  
49  
50  
51  
52  
53  
54  
55  
56  
57  
58  
59  
60

1  
2  
3 at different time points. The variation in time to interview also elucidated the  
4  
5 process of recovery over time.  
6  
7  
8  
9  
10

## 11 **Introduction:**

12  
13  
14  
15 The sequelae of critical illness are well documented with some patients experiencing rapid  
16 muscle wasting<sup>1,2</sup>, which can lead to weakness and functional decline<sup>3</sup>; coupled with the  
17 cognitive consequences of delirium<sup>4</sup> the result can be a prolonged period of weaning from  
18 mechanical ventilation, disability, reduced endurance, anxiety, and depression<sup>5-9</sup>. To combat  
19 this mobilisation, minimising sedation and spontaneous breathing should be instigated early,  
20 with research demonstrating safety and likely efficacy<sup>10-13</sup>. Furthermore, on-going  
21 rehabilitation following discharge from critical care, and attendance at ICU follow up clinics  
22 are also advocated, although research showing direct benefit of these interventions is  
23 limited<sup>14-15</sup>.  
24  
25  
26  
27  
28  
29  
30  
31  
32  
33  
34  
35  
36  
37

38 Although implementation of early mobilisation protocols and post-ICU rehabilitation is  
39 inconsistent<sup>14,16-17</sup>, early adopters of these strategies are striving for them to become the  
40 norm<sup>12,13,18</sup>. In such centres, it is not uncommon for patients to receive active out of bed  
41 physical rehabilitation whilst receiving full mechanical ventilation, renal replacement therapy,  
42 and inotropic support<sup>18</sup>. Due to the severity of weakness that can be associated with  
43 prolonged critical illness, these rehabilitation sessions are often delivered by two or more  
44 therapists/nurses, and can require technical equipment and physical handling. It is perhaps  
45  
46  
47  
48  
49  
50  
51  
52  
53  
54  
55  
56  
57  
58  
59  
60

1  
2  
3 unsurprising that pain, fatigue, weakness, anxiety, fear, lack of motivation and patient  
4  
5 confidence are reported as barriers and reasons for cessation of early rehabilitation<sup>19, 20</sup>.

6  
7  
8  
9 Sottile and colleagues (2015)<sup>21</sup> completed a survey of patient experience of early mobilisation  
10  
11 in ICU concluding that patients recognized the importance of early mobilisation, but found it  
12  
13 difficult, tiring and uncomfortable.  
14

15  
16  
17 In spite of current enthusiasm, there is a paucity of literature exploring survivors' experience  
18  
19 of early mobilisation and physical rehabilitation during and after a stay on ICU in an in-depth  
20  
21 manner. For the purpose of this manuscript, the term 'rehabilitation' is used to encompass  
22  
23 early mobilisation and physical rehabilitation implemented by physiotherapists from  
24  
25 admission to ICU.  
26  
27

28  
29  
30 **Aim:** To explore the patient experience of recovery from critical illness, with emphasis on  
31  
32 their experience of rehabilitation, and to develop a theoretical model grounded in these data.  
33  
34

35  
36 **Methods:**

37  
38  
39 **Qualitative approach and research paradigm:** Constructivist grounded theory study<sup>22</sup> using  
40  
41 semi-structured interviews with a purposive sample of adult ICU survivors. Constructivism  
42  
43 contends that individuals' views are directly influenced by their experiences, and it is these  
44  
45 individual experiences and views that shape their perspective of reality. Constructivists  
46  
47 believe that individuals have different realities that will be influenced by context- this is a  
48  
49 'relativist' ontological stance<sup>22</sup>.  
50  
51  
52  
53  
54  
55  
56  
57  
58  
59  
60

1  
2  
3 Constructivist grounded theory is an appropriate methodology for this study because it allows  
4  
5 the researcher to develop a theoretical model to explain the data based on an iterative  
6  
7 process of data emersion, analysis and interpretation, which recognises and accounts for  
8  
9 contextual factors.<sup>22</sup>  
10  
11

12  
13  
14 **Setting:** Participants were recruited from the adult medical/surgical ICU of a 430 bedded  
15  
16 London teaching hospital between November 2015 and September 2016.  
17

18  
19 **Participants and sampling:** Participants were purposively sampled. Screening and inclusion  
20  
21 criteria were: English-speaking, a critical stay of >72 hours, capable of providing informed  
22  
23 consent determined using the Mental Capacity Act assessment<sup>23</sup>, anticipated to survive, aged  
24  
25 over 18 and documented ICUAW determined via case note review (this was to ensure that  
26  
27 the participants had exposure to rehabilitation interventions.)  
28  
29

30  
31  
32 The clinical team identified potential participants against the broad inclusion criteria stated  
33  
34 above to ensure that it was appropriate for them to be approached by the research team.  
35  
36 Notes were screened with the aim of purposively selecting a varied sample of participants  
37  
38 that could speak to the breadth of emerging themes. If deemed appropriate participants  
39  
40 were then approached by the lead researcher (EJC) and provided with written information. If  
41  
42 they had capacity to consent and agreed to participate, written informed consent was gained.  
43  
44  
45 Participants that could not provide informed consent were excluded.  
46  
47

48  
49  
50 At the discretion of the participant, relatives were also invited to be present in the interview  
51  
52 to enable exploration and elucidation of any ICU associated memory loss. As the study  
53  
54 progressed participants were selected to ensure a heterogeneous sample, with the aim of  
55  
56

1  
2  
3 achieving thematic saturation<sup>22,24-26</sup>, for example, targeting varying degrees of ICUAW,  
4  
5 different genders, and specific age categories.  
6  
7

8  
9 **Ethics:** This study was granted approval by the East of England Ethics committee (REC  
10  
11 reference number 14/EE/1027) and from the Research and Development Department at the  
12  
13 study site.  
14  
15

16  
17 **Data collection methods:** The semi-structured interviews were conducted by EJC. For  
18  
19 reflexivity, EJC is research physiotherapist with expertise in critical care and prior training in  
20  
21 qualitative methods research. EJC also has personal experience of major injury and as a close  
22  
23 relative of an ex ICU patient. SJB is an ICU medical consultant and is involved with ICU follow  
24  
25 up clinics, and EJM is a researcher focusing on management and change in the health sector,  
26  
27 with expertise in qualitative methodology.  
28  
29  
30

31  
32 The interviews followed a topic guide designed with input from the Intensive Care Society  
33  
34 Patient and Relatives Group (Table 1). The questions in the topic guide focused on the  
35  
36 memory of the admission to ICU, any physical weakness that they encountered, and patients'  
37  
38 experience of rehabilitation in the ICU and following discharge. The questions were  
39  
40 intentionally left open to initiate reflections and to allow subsequent detailed exploration of  
41  
42 the issues that appeared important to the interviewee. The first interview was used as a pilot,  
43  
44 however, as no changes were made and those data collected from this interview were rich  
45  
46 and informative, it was retained and analysed in the results.  
47  
48  
49  
50

51  
52 As the study progressed and themes emerged, participants were asked to elaborate and  
53  
54 probed on specific issues in line with the constant comparison technique, for example: how  
55  
56  
57  
58

1  
2  
3 the perception of the physiotherapist's strength influenced their rehabilitation experience;  
4  
5 how they perceived their body now; what differences there were between their current and  
6  
7 previous physical function; how they saw their future; and what they defined as physical  
8  
9 rehabilitation.  
10  
11

12  
13  
14 The interviews were carried out either in the hospital or in the community after ICU discharge.  
15  
16 Enrolment and interviews continued until thematic saturation was reached i.e. no new ideas  
17  
18 were emerging, as per the criteria outlined by Bonde (2013)<sup>26</sup>, this was to challenge the  
19  
20 emergent model and ensure credibility. The interviews were anonymised, recorded, and  
21  
22 transcribed *verbatim* by a professional transcription company. All transcripts were double-  
23  
24 checked for accuracy by EJC.  
25  
26

27  
28  
29 All interviewees were given pseudonyms to ensure anonymity. Further demographic and  
30  
31 clinical data were also collected from the case notes: age, critical care and hospital length of  
32  
33 stay, APACHE II score, admission diagnosis, residence prior to admission, pre-morbid  
34  
35 functional level, and hospital discharge destination.  
36  
37

38  
39  
40 **Data processing and analysis:** Transcripts were uploaded onto Nvivo® software (QSR  
41  
42 International, Doncaster, Australia) for analysis. They were read and reread by EJC to ensure  
43  
44 full immersion in the data. Memo writing was used throughout. The first stage of the analysis  
45  
46 process is 'open coding', which is the identification of primary broad categories; these may  
47  
48 be around a theme or topic, or more conceptual, such as emotion or attitude. The second  
49  
50 stage is 'axial coding'; here categories are clustered together into meaningful, related groups.  
51  
52 The third stage is 'selective coding', where core themes are identified. Lastly, the themes are  
53  
54  
55  
56  
57  
58  
59  
60

1  
2  
3 used to generate a theoretical framework to explain the data<sup>22,24-26</sup>. Data collection and  
4  
5 analysis occur concurrently, so that constant comparison was made between emerging  
6  
7 themes (both within and between narratives), and the literature, allowing model refinement.  
8  
9  
10 After the fourth interview had been transcribed and open coding had been completed, axial  
11  
12 codes began to form. These ideas were then discussed in detail with the research team. This  
13  
14 was followed by a dynamic process of reflection after each interview to develop and refine  
15  
16 the axial codes into selective codes until a model encompassing all elements was developed.  
17  
18 The last interviews were used to challenge this model and to assess for data saturation. This  
19  
20 process allowed a central phenomenon to emerge from the data<sup>22,24-26</sup>. The words used for  
21  
22 coding were based on the lead researchers interpretation and terms in related literature.  
23  
24  
25  
26  
27

### 28 **Techniques to enhance trustworthiness:**

#### 31 **Peer debriefing:**

32  
33  
34  
35 Peer debriefing was completed via in-depth discussion with SJB and EJM. This was done  
36  
37 regularly throughout the course of the study.  
38  
39

#### 41 **Patient and public involvement**

42  
43  
44 A patient representative from an ICU support group was consulted in the development of the  
45  
46 topic guide. An initial draft of the topic guide was developed by the research team and it was  
47  
48 then sent to the patient representative for review and modification, all of their recommended  
49  
50 changes were made. Patients and public were not involved in the recruitment or conduct of  
51  
52  
53  
54  
55  
56  
57  
58  
59  
60



1  
2  
3 the study. Participants were given the opportunity to receive information on the results of  
4  
5 the study at their request.  
6  
7

### 8 9 **Triangulation**

10  
11  
12 Triangulation and sense checking was completed through presentation to an ICU survivor  
13  
14 support group with subsequent dialogue to assess the dependability, confirmability and  
15  
16 credibility of the model (this did not include interview participants).  
17  
18

19  
20 At the support group the model was presented and then there was opportunity for questions  
21  
22 and answers with the researcher (EJC). The group were then left to discuss the study between  
23  
24 themselves and feedback to the research team with any thoughts at a later date to allow  
25  
26 them to speak openly and frankly with each other. The group lead fed back those participants  
27  
28 resoundingly agreed with the concepts and felt that the work '*encompassed all the areas that*  
29  
30 *were important and relevant to those who have experienced critical illness*'. The presentation  
31  
32 also led to a very tearful response from some attendees who reported to have felt  
33  
34  
35  
36  
37 'understood'.  
38  
39

### 40 41 **Results:**

42  
43  
44 Eleven hours of qualitative data from 15 participants (with 4 additional relatives present)  
45  
46 were collected. The *patients* are described in Table 2.  
47  
48

49  
50 *[Insert table 2: Patient demographics]*  
51

52  
53 The median ICU and hospital length of stay were 19 days (IQR 8-33) and 63 days (IQR 34-107)  
54  
55 respectively. The median time between ICU discharge and interview was 56 days (IQR: 36-  
56  
57  
58

1  
2  
3 80). Ten (66.6%) of the interviews took place at the hospital whilst the patients were still  
4 inpatients, and five (33.3%) took place after discharge in the patient's home (n=2), work (n=1),  
5 or in a clinic room (n=2). The interviews lasted a median of 39 minutes (IQR: 28-50).  
6  
7  
8  
9

10  
11 The central phenomenon grounded in these data was *recalibration of the self*. There were  
12 two themes contributing to this temporal model of recovery: the transition '*from prior self to*  
13 *current self*', and the transition '*from current self to construction of the future self*'. When  
14 questioned about early physical function, patients recalled a discrepancy at the time of  
15 recovering awareness between their *current self*, which incorporates their physical  
16 dependency, fatigue, clarity of mind, and self-image, and the mental representation of  
17 themselves, which is still consistent with their *preadmission self*. This discrepancy seemed to  
18 be due to episodic memory loss of their admission period. Additionally, patients lacked some  
19 of the cognitive requirements for prospection at this point<sup>26</sup> and therefore they struggled to  
20 envisage a compelling future self. This appears to lead on to a period of *recalibration*.  
21  
22  
23  
24  
25  
26  
27  
28  
29  
30  
31  
32  
33  
34  
35

36 Although this central phenomenon of *recalibration* may seem distinct from the early physical  
37 rehabilitation experience that was the focus of this study, it was quite the opposite, with the  
38 process of *recalibration* seeming inextricably linked to the rehabilitation experience. Physical  
39 independence and function are core components of the concept of *self*. When physical ability  
40 deteriorates so unexpectedly, rapidly, and without obvious causation (as in ICUAW) it comes  
41 a shock to the patient blurring their sense of self. Physical rehabilitation aims to improve  
42 impairments and function by challenging patients' physical ability thereby, in this extreme  
43 context, inadvertently challenging their self-perception as well.  
44  
45  
46  
47  
48  
49  
50  
51  
52  
53  
54  
55  
56  
57  
58  
59  
60

1  
2  
3 This model suggests that physical rehabilitation within ICU helps patients to challenge and  
4  
5 explore their current functional level and reconcile their self-discrepancy i.e. difference  
6  
7 between their physical self and the cognitive image of themselves. The process of therapy  
8  
9 goal-setting also challenges their capacity to think about the future; discussing goal setting  
10  
11 with participants therefore elucidated the difficulties they may have in constructing a  
12  
13 compelling future to act as a motivational force.  
14  
15  
16

17  
18 The rationale and contributing themes are presented below. Supporting evidence is  
19  
20 presented in Table 3.  
21  
22  
23  
24  
25  
26  
27  
28  
29  
30

### 31 ***'From prior self to current self'***

#### 32 33 34 **Episodic memory loss**

35  
36  
37 Fundamental to the patient experience of rehabilitation, and underpinning the theoretical  
38  
39 interpretation was patients' episodic memory loss (i.e. loss of a specific autobiographical  
40  
41 event) of their admission to ICU, regardless of their admission background or diagnosis. In  
42  
43 some cases this memory gap lasted weeks, with some participants unable to recall any  
44  
45 rehabilitation sessions on ICU at all, citing their ward rehabilitation sessions as their first  
46  
47 experiences. The first clear memory *for all* participants was a family member at the bedside.  
48  
49 This frequently elicited a tearful response, for example, George stated: "*(my first memory on*  
50  
51 *awakening) was my mother stroking my arm, saying 'Mum's here'... that was some 30 days*  
52  
53  
54  
55  
56  
57  
58  
59  
60

1  
2  
3 *after my admission*". This memory loss is of paramount importance, as it made it difficult for  
4  
5 participants to rationalise and understand their current situation.  
6  
7

### 8 9 **Hallucinations and delusions**

10  
11 All patients' experienced vivid hallucinations that often involved torture and trying to escape  
12  
13 some, however, were pleasant experiences, such as a friendly dog in the ICU. Those with a  
14  
15 history of recreational drug use seemed less shocked by hallucinations and able to rationalise  
16  
17 their mental state, for example, John stated: "*you're pumped full of so many drugs, it doesn't*  
18  
19 *surprise me that you're tripping out.*" Perceived stigma influenced patients' comfort in  
20  
21 discussing hallucinations with staff, for example, EJC asked Tom: "*Did you tell anyone about*  
22  
23 *the hallucinations at the time?*" Tom replied: "*No... I just felt a bit silly*".  
24  
25  
26  
27  
28  
29  
30  
31  
32

### 33 **Weakness**

34  
35 On awakening patients reported frustration at their inability to communicate and were  
36  
37 shocked by the severity of their weakness, as mentally they still saw themselves as capable of  
38  
39 the physical tasks they were able to do pre-admission, for example, Sasha stated: "*I didn't*  
40  
41 *realise I couldn't walk. I thought I could and I tried to get out of bed loads of times, but up here*  
42  
43 *I was weak (legs) and the top of my arms were weak as well. I couldn't do it.*" Their actual  
44  
45 *physical-self* and cognitive representation of themselves did not match, for example, Sarah  
46  
47 said: "*I just happened to catch sight of my whole body (in the mirror) and I nearly died. I*  
48  
49 *thought; 'that doesn't resemble the person that I am'.*" However, it was the psychological  
50  
51  
52  
53  
54  
55  
56  
57  
58  
59  
60

1  
2  
3 symptoms that were of the greatest concern to patients initially, for example, Evan felt that:  
4  
5 *“there were tubes all over the place... but that was the least of my worries. The specialists*  
6  
7 *were there, and my son. I said ‘I don’t know who that is (son)’. My son came back on the*  
8  
9 *Monday, then I recognised him and things started falling back into place.”*  
10  
11

### 12 13 14 **“Noxious cycle” of ICU**

15  
16  
17 Overwhelming fatigue, insomnia (due to noise and disruption), boredom and the inability to  
18  
19 concentrate were prevalent, which had a negative impact on the ability to engage in both  
20  
21 physical rehabilitation and cognitive tasks, and made many fear early rehabilitation, for  
22  
23 example, John stated: *“Physically tiring, emotionally, you’re like “sh\*t, really? I’ve got to do it*  
24  
25 *(physiotherapy) now. I haven’t got any energy at all.”* Procedural pain was reported in only a  
26  
27 few instances, but discomfort was problematic, for example, from being ‘swaddled’ in  
28  
29 blankets (John). For many this seemed to form a “noxious cycle” (Figure 1).  
30  
31  
32  
33  
34  
35  
36  
37

### 38 39 **Humanisation of care**

40  
41 Participants’ valued “humanised” care<sup>27</sup>, often remembering the staff members who made  
42  
43 them laugh and feel safe, for example, Caroline said: *“I remember one bloke, one nurse, who-*  
44  
45 *he would come in and smile, and I said ‘Oh, you’re always smiling. You make me so happy’.”*  
46  
47  
48 Trust in the clinical team was also important; if trust was compromised then it had a negative  
49  
50 impact on participants’ engagement with rehabilitation. Trust seemed dependent on the  
51  
52 rapport the staff member developed with the patient, including their ability to communicate,  
53  
54  
55  
56  
57  
58  
59  
60

1  
2  
3 honestly and to maintain patient's hope, for example, Michelle stated: *"I trust him... because*  
4 *when Tom (physiotherapist) says something, it's true. Everything he said was true."* However,  
5  
6 the staff-patient interaction was not always positive, with many patients describing examples  
7  
8 of de-humanised care<sup>27</sup>. This included loss of agency: *"I feel so not free, everyone is doing*  
9  
10 *what they want, I'm like a puppet and I hate that"* (Michelle); and feeling isolated: *"I don't*  
11  
12 *think I had a voice at one point, which was probably one of the most difficult things to*  
13  
14 *experience, because you can't talk to people"* (Richard).  
15  
16  
17  
18  
19  
20

21 Although not related to humanisation of care, the physical attributes of staff also influenced  
22  
23 patients' rehabilitation experience, if physiotherapists looked small, young, and weak, then  
24  
25 patients had less trust in their physical ability to keep them safe during rehabilitation, an  
26  
27 example came from David: *"He (the physio) was strong of course. One admires that. It's an*  
28  
29 *ability, you know; and of course, not everybody's going to have that ability."*  
30  
31  
32  
33

### 34 ***'From current self to construction of the future self'***

#### 35 36 37 **Recognising milestones to recovery and goal setting**

38  
39  
40 The vulnerability described by patients and relatives seemed to lead to a sense of desired  
41  
42 paternalism in the early days; they did not feel ready to be in control. This was further  
43  
44 perpetuated by a lack of understanding of the stages of recovery, for example, Tom stated:  
45  
46 *"how you are improving may not be quite so obvious to the patient"*. The memory loss of their  
47  
48 admission meant that patients did not recall their acute stages of illness, and hence their  
49  
50 physical decline; the weakness that they were experiencing did not make sense, and was  
51  
52 often so severe that it made it difficult to envisage the next steps in their recovery. As a result,  
53  
54  
55  
56  
57  
58  
59  
60

1  
2  
3 patients did not always recognise basic functional tasks as rehabilitation or indeed their  
4  
5 achievements as progress, for example, Michelle stated: *"The other day the whole ward*  
6 *congratulated me- and even now I feel embarrassed – because I washed myself. I didn't wait*  
7 *until now to know how to wash myself; I thought it was so stupid."* Therapeutic adjuncts, such  
8  
9 as the use of a bed bike or tilt table, were more commonly recalled as rehabilitation.  
10  
11  
12  
13  
14  
15

16 As patients had limited understanding of the recovery milestones early on, they wanted the  
17  
18 multi-disciplinary team to set their rehabilitation goals as *"they did not know what goals to*  
19 *set"* (Jim). The main thing that kept them focused on engaging in rehabilitation at this point  
20  
21 was their family and loved ones, Sarah described this: *"I cry a lot...something helped me to*  
22 *keep going, an inner strength came...the kids..."*  
23  
24  
25  
26  
27  
28

29 Patient involvement in early goal setting was described as like *"being in a car crash and*  
30 *someone asking you how you want to be cut out."* Most patients had a 'just get on with it'  
31  
32 approach to rehabilitation. Martin: *"I just blind folded said, 'if this is what I am supposed to*  
33 *do, I will do it.'" However, despite desiring early clinician-led rehabilitation, all patients*  
34  
35 identified a high-level goal that aligned to the core values of who they are; examples include,  
36  
37 returning to work, going on holiday, finishing a PhD, and getting married.  
38  
39  
40  
41  
42  
43

44 As patients progressed through the stages of recovery, they started to recognise smaller  
45  
46 functional gains as improvement and engaged more in the goal-setting and rehabilitation  
47  
48 planning process, for example, Sarah stated: *"Well, I was shocked at how little I could do, but*  
49 *now, it's the other way, I'm actually shocked at how much I can do and I am doing. It's really*  
50  
51  
52  
53  
54  
55  
56  
57  
58  
59  
60

1  
2  
3 *good.*" Their yardstick for comparison now became who they were on awakening, and not  
4  
5  
6 who they were prior to admission; they were recalibrating.  
7

## 8 9 Discussion

10  
11  
12 This work focused on exploring the experience of physical rehabilitation after critical illness,  
13  
14 however, as with inductive research, what transpired was a complex model of recovery  
15  
16 extending beyond the physical. Patients demonstrated an interruption to personal narrative,  
17  
18 a lost sense of self associated with loss of autonomy, temporary desired paternalism and gave  
19  
20 examples of accidental dehumanised care (albeit mostly non-maleficent in intent). Delirium,  
21  
22 sleep deprivation, fatigue and memory loss acted as potent mediators between the patients'  
23  
24 physical impairments, and their ability to recalibrate to their new disability, and engage in  
25  
26 rehabilitation.  
27  
28  
29  
30

31  
32 It is interesting to consider these findings in the context of established psychological theory.  
33  
34 Deci & Ryan's Self-Determination Theory<sup>28,29</sup> attempts to explain why people engage in goal-  
35  
36 orientated behaviour, exploring how this leads to well-being and personal growth. Its three  
37  
38 core concepts are: *autonomy* (the ability to be in control of oneself), *competence* (the ability  
39  
40 to manage the situation they are in) and *relatedness* (the ability to have an emotional  
41  
42 connection with others). Only when these needs are met can intrinsic motivation flourish.  
43  
44  
45  
46  
47 Critical illness can strip patients of *autonomy* and *competence*, and perhaps for a shorter  
48  
49 period, *relatedness*. In the initial stages of critical illness, patients may be unable to  
50  
51 communicate and talk, be unable to move easily due to weakness, may have hallucinations,  
52  
53 and be too fatigued to engage in decision making. Hence, loss of *autonomy* and *competence*  
54  
55  
56  
57  
58  
59  
60



1  
2  
3 are key features of the patient experience. *Relatedness*, which may recover earlier (or be  
4 encouraged) is of paramount importance to them, and was a motivator to engage in  
5 rehabilitation.  
6  
7  
8  
9

10  
11 Markus and Nurius (1986) developed a theory called "The Possible Self"<sup>30</sup>. They contend that  
12 humans have different cognitive representations of who we are (*current self*) and who we  
13 could be (*possible self*). *Possible selves* drive behaviour. A notion of the *possible self* helps us  
14 to assess our *current self*; by creating a comparison for self-evaluation; therefore this concept  
15 is innately linked with goal setting. *The possible self* and goal setting also rely heavily on  
16 temporality, therefore requiring narrative of the past, and the capacity to prospect.  
17 Physiologically, prospection depends on episodic memory, prospective memory, emotional  
18 stability and hypothetical thinking<sup>31</sup>, some of which can be impaired in critical illness due to  
19 sleep deprivation, fatigue and delirium.  
20  
21  
22  
23  
24  
25  
26  
27  
28  
29  
30  
31  
32  
33

34 On awakening, patients' immediate cognitive representation of their *current self* matched  
35 their pre-admission self because they do not remember their functional decline, however,  
36 their body had changed. Their mental image of their *current self* and their *physical self* are  
37 not aligned. Furthermore, patients could not remember the totality of their past, they did not  
38 recognise their present, and they struggled to construct a compelling future self. This  
39 impaired their ability to engage in rehabilitation goal setting and led to a sense of  
40 vulnerability, desired paternalism and emphasis on *relatedness*.  
41  
42  
43  
44  
45  
46  
47  
48  
49  
50  
51

52 This model of *recalibration* ties these established psychological ideas together, reflecting the  
53 need for patients to explore their new self, adapt to it and allow it to become their new  
54  
55  
56  
57  
58  
59  
60

1  
2  
3 yardstick. When this was achieved, smaller milestones in recovery became meaningful goals.

4  
5 Others have described similar concepts as a *liminal* state. Liminality is an anthropological  
6  
7 term from the Latin word *limen*, meaning threshold<sup>32</sup>. It refers to someone who is  
8  
9 transitioning. It is often associated with a change in role/identity, or a loss of one self to be  
10  
11 replaced with another. This can create inner turmoil, especially if that change is not invited.  
12  
13  
14

15  
16 This idea of liminality in ICU has been touched upon by a number of authors<sup>32-35</sup>. Kean and  
17  
18 colleagues<sup>32</sup> identified 'unscheduled status passage' from *prior self* to *critically ill self* as a  
19  
20 theme in a longitudinal study of ICU survivorship. They found that this unscheduled liminal  
21  
22 stage is worsened by memory loss and delirium, and that this process of change is temporal  
23  
24 in nature, both progressing and regressing (in the event of decline). In order to move on,  
25  
26 patients need to regain autonomy.  
27  
28  
29

30  
31 Lindberg and colleagues<sup>35</sup> described what recovering autonomy looks like, suggesting that  
32  
33 patients go through four stages: the first is to acknowledge their dependence (or  
34  
35 paternalism), and then they strive to be recognised as a person ("humanised" care). These  
36  
37 two stages echo the findings of this study. The latter two stages are 'invited participation in  
38  
39 care', and 'becoming a co-partner in the decision-making'. These stages describe how staff  
40  
41 coach patients to take control again through mutual trust, understanding and co-  
42  
43 determination.  
44  
45  
46  
47  
48

49  
50 Although these may seem like abstract concepts, it is the authors' view that they have direct  
51  
52 relevance to clinical practice, especially as early rehabilitation becomes a key aspect of acute  
53  
54  
55  
56  
57  
58  
59  
60

1  
2  
3 care. The reason for this is that perception of self and engagement in rehabilitation and goal-  
4  
5 setting are inextricably linked.  
6

7  
8  
9 If a person's mind is telling them one thing about who they are and what they are capable of  
10  
11 doing, and their body is telling them another, they cannot start thinking about the future until  
12  
13 they reconcile that difference. They cannot reconcile that difference with delirium,  
14  
15 hallucinations and lack of episodic memory to justify their current situation and facilitate  
16  
17 hypothetical thinking and prospection<sup>31</sup>. Combining psychological intervention with  
18  
19 physiotherapy intervention may help to address this.  
20  
21  
22

23  
24 Goal-setting depends on the capacity to prospect, it is also a key recommendation in the UK  
25  
26 National Institute for Health and Care Excellence (NICE) Guidelines for Rehabilitation after  
27  
28 Critical Illness<sup>36</sup> and NICE Quality Standards<sup>37</sup>. The Quality Standards state that rehabilitation  
29  
30 goals should be set within 4-days of admission, and ideally should be patient-agreed. These  
31  
32 data would suggest that asking *patients* to set goals at day 4 may be premature. Further  
33  
34 research exploring the application of the model of recovering autonomy described by  
35  
36 Lindberg<sup>35</sup> may assist in tailoring rehabilitation guidelines to the specific needs of the critically  
37  
38 ill.  
39  
40  
41  
42  
43

44  
45 Further focus on *how* rehabilitation is delivered, not just *what* is delivered could also be  
46  
47 instructive. The impact of the dynamic between a sports coach and the players is well known,  
48  
49 yet this coaching dynamic is neglected somewhat in ICU rehabilitation. If clinicians are able to  
50  
51 assist patients in recalibrating to their *new current self*, and the reconstruction of a compelling  
52  
53 *future self*, it may improve patient care and outcome. Further research will be needed to  
54  
55  
56  
57  
58  
59  
60

confirm the concepts identified in this initial exploratory study. However, we believe the concepts identified are sufficiently plausible and robust to pose challenges to clinicians working with recovering critically ill patients (outlined in Box 1).

### Box 1: Key observations and challenges to practice.

#### Key observations

- ❖ Patients recovering consciousness during or after a critical illness are likely to be shocked by the transition through which they have gone; part of that shock is the due to the unplanned interruption of their autobiographical story.
  - How can you help to fill the gaps in autobiographical memory?
- ❖ Patients' immediate memory is of who they were and what they were able to do before their critical illness; this is in collision with what they can actually do and a period of recalibration is needed to allow people to align the two and develop reasonable ambitions and goals.
  - How can you support patients to explore their current function and settle the discrepancy between expectations and reality?
- ❖ This recalibration is the development of an understanding of the relationships between their past, present and possible futures selves.
  - How can you help patients to envisage a compelling future?
- ❖ Because of this need for recalibration along with delirium and impaired cognition patients may need, and wish for, assistance in planning early rehabilitation. As autonomy recovers, patients desire to become fully involved increases.
  - How can you recognise and support recovering autonomy?

- 1  
2  
3 ❖ Motivation and engagement are crucial in maximising the benefits of rehabilitation.  
4 Leveraging human relationships (relatedness) and encouraging autonomy are likely  
5 to be helpful; care that is de-humanising, even if “efficient” is likely to impair  
6 recovery.  
7  
8  
9  
10 ➤ How can humanisation of care be optimised in your ICU?  
11  
12  
13  
14  
15

16 **Acknowledgements:** Thanks to Dr Cherry Kilbride and Dr William Young (Brunel University  
17 London) for their input into the theoretical interpretation of these data. Thank you to  
18 Gordon Sturmev and the ICU support network in Reading for their involvement and support  
19 with the study.  
20  
21  
22  
23  
24  
25  
26  
27  
28  
29  
30  
31  
32  
33  
34  
35  
36  
37  
38  
39  
40  
41  
42  
43  
44  
45  
46  
47  
48  
49  
50  
51  
52  
53  
54  
55  
56  
57  
58  
59  
60

**References:**

1. Puthuchery ZA, Rawal, JR, McPhail M, Connolly B, Ratnayake G, Chan P, Hopkinson NS, Phadke R, Dew T, Sidhu PS, Velloso C, Seymour A, Agle CC, Selby A, Limb M, Edwards LM, Smith K, Rowleron A, Rennie MJ, Moxham J, Harridge S, Hart N, Montgomery HE. Acute Skeletal Muscle Wasting in Critical Illness. *JAMA*, 2013; 310 (15), 1591-1600.
2. Friedrich O, Reid MB, Van den Berge G, Vanhorebeek I, Hermans G, Rich MM, Larsson L. The sick and the weak: Neuropathes/myopathies in the critically ill. *Physiol Rev*. 2015; 95 (3), 1025-109.
3. Hermans G, & Van den Berghe G. Clinical review: intensive care unit acquired weakness. *Crit Care*. 2015; 5 (19), 274.
4. Cavalazzi R, Saad M, Marik PE. Delirium in the ICU: an overview. *Ann Intensive Care*. 2012; 2 (49).
5. Kress JP & Hall JB. Intensive care unit acquired weakness and recovery from critical illness. *N Eng J Med*. 2014; 370, 1626-1635.
6. Cuthbertson BH, Elders A, Hall S, Taylor J, MacLennan G, MacKirdy F, Mackenzie SJ, and the Scottish Critical Care Trials Group and the Scottish Intensive Care Society Audit Group. Mortality and quality of life in the five years after severe sepsis. *Critical Care*. 2013; 17, R70.
7. Kaukonen K-M, Bailey M, Suzuki S, Pilcher D, Bellomo R. Mortality related to severe sepsis and septic shock among critically ill patients in Australia and New Zealand, 2000-2012. *JAMA*. 2014; 311 (13), 1308-1316.
8. Hill AD, Fowler RA, Pinot R, Herridge MS, Cuthbertson BH, Scales DC. Long-term outcomes and healthcare utilization following critical illness – a population-based study. *Critical Care*. 2016; 20, 76.
9. Pandharipande P, Girard TD, Jackson JC, Morandi A, Thompson JL, Pun NE, Brummel CG, Highes EE, Vasilevskis AK, Shintani KG, Moons SK, Geevaghese A, Canonico RO, Hopkins RO, Bernad GR, Dittus RS, Ely EW. Long-Term Cognitive Impairment after Critical Illness. *N Engl J Med*. 2013: 369, 1306-1316.

10. Nydahl P, Sricharoenchai T, Chandra S, Kundt FS, Huang M, Fischill M., Needham D.M. Safety of Patient Mobilization and Rehabilitation in the Intensive Care Unit. Systematic Review with Meta-Analysis. *Annals of the American Thoracic Society*. 2017; 14 (5).
11. Castro-Avila AC, Seron P, Fan E, Gaete M, Mickan S. (2015) Effect of early rehabilitation during Intensive Care Unit stay on functional status: systematic review and meta-analysis. *PLoS ONE*. 2015: 10 (7), e0130722.
12. Balas MC, Burke WJ, Gannon D, Cohen MZ, Colburn L, Bevil C, Franz D, Olsen KM, Ely WE, Vasilevski EE (2013) Implementing the awakening and breathing coordination, delirium monitoring/management, and early exercise/mobility bundle into everyday care: opportunities, challenges, and lessons learned from implementing the ICU pain, agitation and delirium guidelines. *Crit Care Med*. 2013; 41: S116-S127.
13. Balas MC, Vasilevskis EE, Olsen KM, Schmid KK, Shostrum V, Cohen MZ, Peitz G, Gannon DE, Sisson J, Sullivan J, Stohtert JC, Lazure J, Nuss SL, Jawa RS, Freihurt F, Ely EW, Burke WJ. (2014) Effectiveness and safety of the awakening and breathing coordination, delirium monitoring/management, and early exercise/mobility bundle. *Crit Care Med*. 2014; 42:1024-1036.
14. Connolly B, Douiri A, Steier J, Moxham J, Denehy L, Hart N. A UK survey of rehabilitation following critical illness: implementation of NICE Clinical Guidance 83 (CG83) following hospital discharge. *BMJ Open*. 2014: 4; e004963.
15. Jensen JF, Thomsen T, Overgaard D, Bestle MH, Christensen D, Egerod I. Impact of follow-up consultations for ICU survivors on post-ICU syndrome: a systematic review and meta-analysis. *Intensive Care Med* (2015) 41:763–775
16. Nydahl P, Parker RA, Bartoszek G, Dubb R, Filipovic,S, Flohr H-J, Kaltwasser A, Mende H, Rothaug O, Schuchhardt D, Schwabbauer N, Needham D. Early Mobilization of Mechanically Ventilated Patients: A 1-Day Point-Prevalence Study in Germany. *Critical Care Medicine*. 2014; 42 (5), 1178-1186.
17. Berney SC, Rose JW, Bernhardt J, Denehy L, Prospective observation of physical activity in critically ill patients who were intubated for more than 48 hours. *Journal of Critical Care*. 2015; 30(4), 658-663.

18. Hodgson CL, Stiller K, Needham D, Tipping CJ, Harrold M, Baldwin CE, Bradley S, Berney S, Caruana LR, Elliott D, Green M, Haines K, Higgins AM, Kaukonen KM, Leditschke IA, Nickels MR, Paratz J, Patman S, Skinner EH, Young PJ, Zanni JM, Denehy L, Webb SA. Expert consensus and recommendations on safety criteria for active mobilisation of mechanically ventilated critically ill patients. *Critical Care*. 2014; 16:658.
19. Parry S, Knight LD, Connolly B, Baldwin C, Puthuchery Z, Morris P, Mortimore J, Hart N, Denehy L, Granger CL. Factors influencing physical activity and rehabilitation in survivors of critical illness: a systematic review of quantitative and qualitative studies. *Intensive Care Med*. 2017; 43, 531–542.
20. Wright SE, Thomas K, Watson G, Baker C, Bryant A, Chadwick, TJ, Shen J, Wood R, Wilkinson J, Mansfield L, Stafford V, Wade C, Furneal J, Henderson A, Hugill K, Howard P, Roy A, Bonner S, Baudouin S. Intensive versus standard physical rehabilitation therapy in the critically ill (EPICC); a multicentre, parallel-group, randomised controlled trial. *Thorax*. 2017; (5).
21. Sottile PD, Nordon-Craft A, Malone D, Schenkman M, Moss M. Patient and family perceptions of physical therapy in the medical intensive care unit. *Journal of Critical Care*. 2015; 30, 891-895.
22. Mills, J., Bonner, A., Francis, K. (2006) The development of constructivist grounded theory. *International Journal of Qualitative Research Methods*. 5 (1).
23. Mental Capacity Act (2005). UK legislation. Available at: <https://www.legislation.gov.uk/ukpga/2005/9/contents>
24. Corbin, J. & Strauss, A. (2015) *Basics of qualitative research: techniques and procedures for developing grounded theory*. 4th edition. London
25. Heath H, Cowley S. Developing a grounded theory approach: a comparison of Glaser and Straus. *International Journal of Nursing Studies*. 2004; 41, 141-150.
26. Bode, D. (2013) *Qualitative Interviews: When enough is enough*. Research by Design.
27. Todres L, Galvin KT, Holloway I. The humanisation of healthcare: a value framework for qualitative research. *International Journal of Qualitative Studies on Health and Well-being*. 2009; 4, 68-77.



- 1  
2  
3  
4  
5  
6  
7  
8  
9  
10  
11  
12  
13  
14  
15  
16  
17  
18  
19  
20  
21  
22  
23  
24  
25  
26  
27  
28  
29  
30  
31  
32  
33  
34  
35  
36  
37  
38  
39  
40  
41  
42  
43  
44  
45  
46  
47  
48  
49  
50  
51  
52  
53  
54  
55  
56  
57  
58  
59  
60
28. Deci EL, Ryan RM. Intrinsic motivation and self-determination in human behavior. New York, NY: Plenum. 1985.
  29. Deci EL, Ryan RM. (2017) <http://selfdeterminationtheory.org/theory/> (Accessed: 30th March 2017)
  30. Markus H & Nurius P. Possible Selves. *American Psychologist*. 1986; 41 (9), 954-969
  31. Osman M. What are the essential cognitive requirements for prospection (thinking about the future)? *Frontiers in Psychology*. 2014;5, 626.
  32. Kean S, Salisbury LG, Rattray J, Walsh TS, Huby G, Ramsey, P. 'Intensive Care Unit (ICU) Survivorship' – a constructivist grounded theory of surviving critical illness. *Journal of Clinical Nursing*. 2017. [online].
  33. Johnston LB. Surviving Critical Illness: A Case Study in Ambiguity. *Journal of Social Work in End-of-Life & Palliative Care*. 2011; 7 (4), 363-382.
  34. Darbyshire JL, Greig PR, Vollam S, Young DJ, Hinton L. "I Can Remember Sort of Vivid People... but to Me They Were Plasticine." *Delusions on the Intensive Care Unit: What Do Patients Think is Going on?* *PLoS ONW*; 11 (4): e0153775.
  35. Lindberg C, Sivberg B, Willman A, Fagerstrom C. A trajectory towards partnership in care – patients perspective of autonomy in intensive care: A qualitative study. *Intensive and Critical Care Nursing*. 2015;31: 294-302.
  36. National Institute for Health and Clinical Excellence. Great Britain. *Rehabilitation After Critical Illness* Great Britain. Available at: [www.nice.org.uk](http://www.nice.org.uk). 2009.
  37. National Institute for Health and Clinical Excellence (2017). *Rehabilitation after Critical illness in adults: Quality Standard*. Published 7th September 2017. Available online: [nice.org.uk/guidance/qs158](http://nice.org.uk/guidance/qs158). (Accessed: 13th September 2017)

**Table 1: Topic guide**

| <b>Topic guide</b>                                                                                                                                                      |
|-------------------------------------------------------------------------------------------------------------------------------------------------------------------------|
| <b>Opening</b>                                                                                                                                                          |
| 1. Introduction                                                                                                                                                         |
| 2. Consent confirmed.                                                                                                                                                   |
| <b>Questions</b>                                                                                                                                                        |
| 3. Do you have any questions about the about the patient information sheet?                                                                                             |
| 4. Could you tell me about the events leading up to your admission to the ICU?                                                                                          |
| 5. Could you summarize, as you remember it, your stay on the ICU including the length of your stay and the procedures you experienced (e.g. surgery, tracheostomy etc)? |
| 6. Could you describe any physical problems that you had during and after your stay, such as weakness, pain, joint stiffness etc?                                       |
| 7. Could you describe your rehabilitation experience?                                                                                                                   |
| - Memories of rehabilitation                                                                                                                                            |
| - Rehabilitation equipment                                                                                                                                              |
| - Interaction with the therapist                                                                                                                                        |
| - Intensity of rehabilitation                                                                                                                                           |
| - Rehabilitation goal setting                                                                                                                                           |
| <b>Closing</b>                                                                                                                                                          |
| 8. Do you have any additional information you would like to add?                                                                                                        |
| 9. Do you have any questions?                                                                                                                                           |
| <b>End</b>                                                                                                                                                              |

Table 2: Summary of each participant

| Pseudonym | Relative present? | Age range (years) | APACHE II | Diagnosis                                           | Length of stay, ICU (days) | Length of stay, hospital (days) | Discharge location                                         |
|-----------|-------------------|-------------------|-----------|-----------------------------------------------------|----------------------------|---------------------------------|------------------------------------------------------------|
| Richard   | No                | 30-39             | 17        | Acute porphyria                                     | 9                          | 102                             | Long-term, inpatient rehabilitation                        |
| Martin    | No                | 30-39             | 14        | Drug overdose, aspiration pneumonia, rhabdomyolysis | 26                         | 32                              | Home, outpatient rehabilitation                            |
| Sadiq     | No                | 50-59             | 22        | Exacerbation of COPD                                | 33                         | 34                              | Home, full care package                                    |
| Sarah     | No                | 60-69             | 24        | Open hernia repair- post operative MOF              | 115                        | 197                             | Long-term, inpatient rehabilitation                        |
| Tom       | No                | 60-69             | 10        | Pneumonia and pulmonary embolism                    | 10                         | 16                              | Home, outpatient rehabilitation                            |
| Evan      | No                | 60-69             | 15        | Acute bowel obstruction- colon cancer               | 5                          | 48                              | Home, no rehabilitation.                                   |
| Sasha     | Yes, daughter     | 50-59             | 10        | Neuromyelitis optica                                | 19                         | 98                              | Long-term, inpatient rehabilitation                        |
| John      | No                | 40-49             | 27        | Influenza                                           | 33                         | 71                              | Long-term, inpatient rehabilitation                        |
| George    | No                | 50-59             | 12        | Drug overdose- respiratory failure                  | 25                         | 36                              | Home, no rehabilitation                                    |
| Michelle  | No                | 80-89             | 14        | Exacerbation of COPD                                | 6                          | 42                              | Declined inpatient rehabilitation- home, full care package |
| Jim (M)   | Yes, wife         | 50-59             | 11        | Food poisoning-                                     | 10                         | 18                              | Home, no                                                   |

|              |                   |       |    |                                           |     |     |                                       |
|--------------|-------------------|-------|----|-------------------------------------------|-----|-----|---------------------------------------|
|              |                   |       |    | MOF                                       |     |     | rehabilitation                        |
| Matthew (M)  | No                | 70-79 | 18 | Hospital acquired pneumonia-fractured NOF | 5   | 178 | Nursing home                          |
| Caroline (F) | Yes, husband      | 70-79 | 22 | Anterior resection for bowel cancer       | 13  | 63  | Short-stay, inpatient rehabilitation. |
| Ben (M)      | No                | 40-49 | 15 | Drug overdose                             | 65  | 107 | Home, care package                    |
| David (M)    | Yes, wife present | 63    | 21 | Influenza                                 | 150 | 232 | Long-term, inpatient rehabilitation   |

(NOF-neck of femur; MOF-multi-organ failure; COPD-chronic obstructive pulmonary disease; APACHE II- acute physiology and chronic health evaluation II; ICU – Intensive Care Unit)

**Table 3:** Supporting data

| <b>Central phenomenon: Recalibration of The Self</b>                                                                                                                                                                                                                                                                                                                                                                                                         |                                                                                                                                                                                                                                                                                                                                                                                                                                                                                                                       |
|--------------------------------------------------------------------------------------------------------------------------------------------------------------------------------------------------------------------------------------------------------------------------------------------------------------------------------------------------------------------------------------------------------------------------------------------------------------|-----------------------------------------------------------------------------------------------------------------------------------------------------------------------------------------------------------------------------------------------------------------------------------------------------------------------------------------------------------------------------------------------------------------------------------------------------------------------------------------------------------------------|
| <b>Main theme 1: "From prior self to current self"</b>                                                                                                                                                                                                                                                                                                                                                                                                       |                                                                                                                                                                                                                                                                                                                                                                                                                                                                                                                       |
| <p><i>Sasha: "I didn't realize I couldn't walk. I thought I could and I tried to get out of bed loads of times, but up here I was weak (legs) and the top of my arms were weak as well. I couldn't do it."</i></p> <p><i>Sarah: "I don't ever look at myself in the mirror and there is a mirror in that bathroom, I just happened to catch sight of my whole body almost and I nearly died. I thought; that doesn't resemble the person that I am."</i></p> |                                                                                                                                                                                                                                                                                                                                                                                                                                                                                                                       |
| <b>Episodic memory loss</b>                                                                                                                                                                                                                                                                                                                                                                                                                                  | <p><b>ICU admission</b></p> <p>Sasha: "...that's when I don't know, it's a real black after that (the emergency room)"</p> <p>Sadiq: "That is a black. That is a blank. Totally blank"</p> <p>John: "I must have been in and out of consciousness, because I don't remember anything"</p> <p>Ben: " I had a bad fall, collapsed... that's all I remember"</p>                                                                                                                                                         |
|                                                                                                                                                                                                                                                                                                                                                                                                                                                              | <p><b>Rehabilitation and mobilization</b></p> <p>EJC: "what was your memory of getting moving after you woke up with the tubes attached?" Ben: "I don't really have much memory of it."</p> <p>EJC: Do you remember any of the rehab on ICU?" Martin: "Not to start with, no."</p> <p>David: "It was Dan (ward physiotherapist) who taught me to sit on the edge of the bed."</p> <p>EJC: "Do you remember getting into the chair for the first time?" Michelle: "It was with Tom (the ward physical therapist)."</p> |
| <b>Hallucinations and delusions</b>                                                                                                                                                                                                                                                                                                                                                                                                                          | <p>John: "I kept thinking I could see like people with hoodies and they were like assassins, trying to get in."</p> <p>David: "I was taken into Soho (Central London) by some people and stuck under a glass floor, lying under a glass floor with formaldehyde around me. I was encased."</p> <p>Ben: "I operated on Margaret Thatchers cat and there was eight other people in the house and three of them got shot... I remember waking up with the fear that I was going to get shot."</p>                        |

|                                                                                                                                                                                                                                                                                                                                                                                                                                           |                                                                                                                                                                                                                                                                                                                                                                                                                                                                                                                                                                                                                                                                                                                                                                                                                                                                                                                                                                                                                                                                   |
|-------------------------------------------------------------------------------------------------------------------------------------------------------------------------------------------------------------------------------------------------------------------------------------------------------------------------------------------------------------------------------------------------------------------------------------------|-------------------------------------------------------------------------------------------------------------------------------------------------------------------------------------------------------------------------------------------------------------------------------------------------------------------------------------------------------------------------------------------------------------------------------------------------------------------------------------------------------------------------------------------------------------------------------------------------------------------------------------------------------------------------------------------------------------------------------------------------------------------------------------------------------------------------------------------------------------------------------------------------------------------------------------------------------------------------------------------------------------------------------------------------------------------|
|                                                                                                                                                                                                                                                                                                                                                                                                                                           | <p>Carolyn: "I was trying to use my mobile (to escape), and the same number kept on pressing and I remember panicking"</p>                                                                                                                                                                                                                                                                                                                                                                                                                                                                                                                                                                                                                                                                                                                                                                                                                                                                                                                                        |
| <p><b>Weakness</b></p>                                                                                                                                                                                                                                                                                                                                                                                                                    | <p>George: "Nothing, I couldn't move my hand. I couldn't move and that was really scary. Really scary."</p> <p>Richard: " I couldn't do anything. I was paralyzed from the neck down... I still felt like I had sensation in my legs and my arms, I just couldn't move them."</p> <p>Carolyn: "I couldn't even stand up. I was really very, very weak."</p> <p>John: "I couldn't do anything. I mean literally, I couldn't move, I could just barely move my fingers."</p> <p>David: "I couldn't move. I couldn't move at all. I could blink, that's about it."</p> <p>Martin: "...couldn't walk, couldn't do nothing."</p> <p>Richard: "You are reliant entirely on the people around you, for everything really... that's difficult."</p>                                                                                                                                                                                                                                                                                                                       |
| <p><b>Noxious cycle of ICU</b></p>                                                                                                                                                                                                                                                                                                                                                                                                        | <p>Sarah: "I didn't want to do it (physiotherapy). I used to dread them coming, any excuse to get out of it. I was just so tired."</p> <p>John: "Physically tiring, emotionally... you're like 'sh*t really? I've got to do it (mobilization) now? I haven't got any energy at all.'"</p> <p>George: "There were some days when they'd (physiotherapist) come and they'd get me into the chair, and they'd want to do some work on the zimmer frame. They'd come back (from getting the zimmer frame) and I'd be asleep."</p> <p>Sarah: "People kept telling me to read, but I couldn't. I couldn't' actually physically read. They'd bring me the menu and I just couldn't do it, and then I'd fall asleep"</p> <p>Sarah: "...then I just accepted it (weakness), going...on the hoist and, you lose all dignity when you're in that state you just accept it, and you just let them help you as much as possible and when you've done your, you know bits of physio, exhausted, you go back to bed again, sleep again. You know it tended to be like that."</p> |
| <p style="text-align: center;"><b>Main theme 2: "From current self to construction of the future self"</b></p> <p>Ben: <i>"The first days when I couldn't move... I was disillusioned with the whole thing, and I thought, 'This is never going to work'... I couldn't see how anything could turn round, but I was told just to trust. But that period was very difficult because when you don't see any light at the end of the</i></p> |                                                                                                                                                                                                                                                                                                                                                                                                                                                                                                                                                                                                                                                                                                                                                                                                                                                                                                                                                                                                                                                                   |

*tunnel, it's difficult to sort of engage with it, and it's difficult to trust... There was plans in my head, but it's difficult to kind of have them if you think it's just a waste of time what you're doing. Now I know that there is (light at the end of the tunnel)... and I believe I'll be walking next week, they've (physiotherapists) let me believe that"*

**Recovery milestones and goal setting**

Matthew: "Let the patient realize that he is not capable of doing that, or this, or whatever... don't tell him"

Tom: "Everyone's functions, and how they are improving, might not be quite so obvious to the patient."

Carolyn: "The other day the whole ward congratulated me- and even now I feel embarrassed – because I washed myself. I didn't wait until now to know how to wash myself; I thought it was so stupid."

Jim's wife: "We didn't want to set the goals, because we didn't know what goals to set"

Sadiq: "It depends on the person. If a person is shooting to the high, they might do it (achieve their goal), but sometimes shooting too much to the high might break your neck. If they are too sick, they cannot talk, you are in the dark and you have to put your own objectives."

Researcher: "What have been the things that have kept you going?" Sasha: "I think Gemma (daughter) and her dad, they've been so supportive. He's been down every day, and Gemma sometimes twice a day \*starts crying\*... sorry... I suppose if it wasn't for them, I wouldn't be... \*crying- unable to finish sentence\*

Richard: "obviously I was doing it (rehab) for me primarily, but knowing how much concern and love she has for me, and knowing how much it would mean to her and how much of a relief it would be to her... The fact that she was, you know with me for as long as she was, and as strong as she was... I don't know. I never thought my mum was that strong."

1  
2  
3  
4  
5  
6  
7  
8  
9  
10  
11  
12  
13  
14  
15  
16  
17  
18  
19  
20  
21  
22  
23  
24  
25  
26  
27  
28  
29  
30  
31  
32  
33  
34  
35  
36  
37  
38  
39  
40  
41  
42  
43  
44  
45  
46  
47  
48  
49  
50  
51  
52  
53  
54  
55  
56  
57  
58  
59  
60

Figure legends

**Figure 1: The noxious cycle of critical illness.**

For peer review only



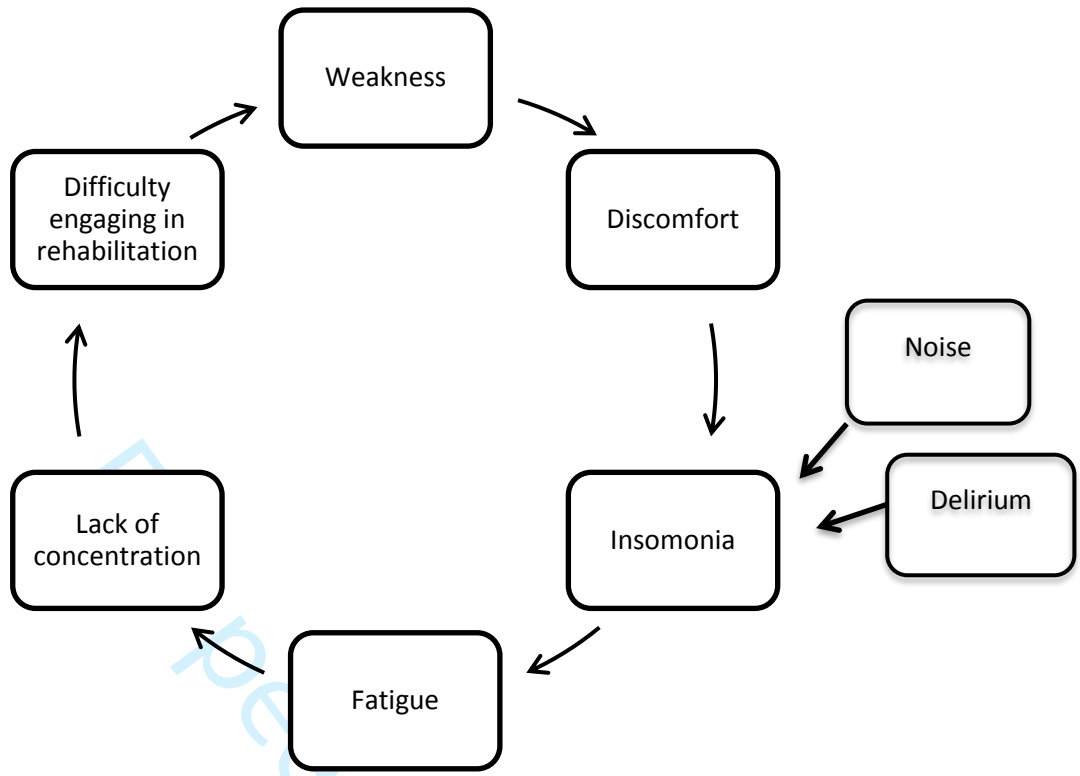

**Figure 1:** noxious cycle of ICU

# BMJ Open

## A Qualitative, Grounded Theory Exploration of Patients' Experience of Early Mobilisation, Rehabilitation and Recovery after Critical Illness.

|                                 |                                                                                                                                                                                                                                                                                                                                                       |
|---------------------------------|-------------------------------------------------------------------------------------------------------------------------------------------------------------------------------------------------------------------------------------------------------------------------------------------------------------------------------------------------------|
| Journal:                        | <i>BMJ Open</i>                                                                                                                                                                                                                                                                                                                                       |
| Manuscript ID                   | bmjopen-2018-026348.R2                                                                                                                                                                                                                                                                                                                                |
| Article Type:                   | Research                                                                                                                                                                                                                                                                                                                                              |
| Date Submitted by the Author:   | 07-Jan-2019                                                                                                                                                                                                                                                                                                                                           |
| Complete List of Authors:       | Corner, Evelyn; Brunel University Department of Clinical Sciences; The Royal Brompton and Harefield NHS Trust<br>Murray, Eleanor; University of Oxford Said Business School, Said Business School<br>Brett, Stephen; Imperial College London Department of Surgery and Cancer; Imperial College Healthcare NHS Trust, Anaesthetics and Intensive Care |
| <b>Primary Subject Heading</b>: | Intensive care                                                                                                                                                                                                                                                                                                                                        |
| Secondary Subject Heading:      | Rehabilitation medicine, Qualitative research                                                                                                                                                                                                                                                                                                         |
| Keywords:                       | INTENSIVE & CRITICAL CARE, REHABILITATION MEDICINE, PATIENT EXPERIENCE, RECOVERY, PHYSIOTHERAPY                                                                                                                                                                                                                                                       |
|                                 |                                                                                                                                                                                                                                                                                                                                                       |

SCHOLARONE™  
Manuscripts

**Title:** A Qualitative, Grounded Theory Exploration of Patients' Experience of Early Mobilisation, Rehabilitation and Recovery after Critical Illness.

**Authors:** Dr Evelyn J. Corner<sup>1,2,3</sup>, Dr Eleanor J. Murray<sup>4</sup>, Professor Stephen J. Brett<sup>5,6</sup>

1. Department of Clinical Sciences, Brunel University London, UK. Phone number: +44 1895 268489
2. Chelsea and Westminster NHS Foundation Trust, London, UK
3. The Royal Brompton and Harefield NHS Foundation Trust, London, UK.
4. Saïd Business School, University of Oxford, Oxford, UK. Phone number: +44 (0)1865 614828
5. Department of Surgery and Cancer, Imperial College London, UK
6. Centre for Perioperative Medicine and Critical Care Research, Imperial College NHS Healthcare Trust, Hammersmith Hospital, London, UK. Phone number: +44 208 383 4521

**Corresponding author:**

Email: [evelyn.corner@brunel.ac.uk](mailto:evelyn.corner@brunel.ac.uk)

Phone number: +44 1895 268489

**Financial support:** This study was kindly funded by The Joint Research Committee at Chelsea and Westminster Hospital on behalf of a joint collaboration between the Chelsea and Westminster Medical School Research Trust (Registered Charity No. 247808) and Chelsea and Westminster Health Charity, and Brunel University London. EJM acknowledges the support of The Health Foundation. SJB is grateful for the support of the National Institute for Health Research (NIHR) comprehensive Biomedical Research Centre based at Imperial College Healthcare NHS Trust and Imperial College London. The views expressed are those

1  
2  
3 of the authors and not necessarily those of the NHS, The Health Foundation, the NIHR or the  
4  
5 Department of Health.  
6  
7

8  
9 **Competing interests:** No competing interests to declare.  
10

11  
12 **Authors contribution to the study:** EJC, SJB and EJM were involved in the methodological  
13  
14 design, data analysis and writing and reviewing the manuscript. EJC did all of the interviews  
15  
16 and data collection.  
17  
18

19  
20 **Data sharing statement:** All available data can be obtained by contacting the corresponding  
21  
22 author.  
23  
24

25  
26 **Word count: 4,479**  
27  
28  
29  
30  
31  
32  
33  
34  
35  
36  
37  
38  
39  
40  
41  
42  
43  
44  
45  
46  
47  
48  
49  
50  
51  
52  
53  
54  
55  
56  
57  
58  
59  
60

## Abstract

**Rationale:** Physical rehabilitation (encompassing early mobilisation) of the critically ill patient is recognized best practice, however further work is needed to explore the patients' experience of rehabilitation qualitatively; a better understanding may facilitate implementation of early rehabilitation, and elucidate the journey of survivorship.

**Objectives:** To explore patient experience of physical rehabilitation from critical illness during and after a stay on ICU.

**Design:** Exploratory grounded theory study using semi-structured interviews.

**Setting:** Adult medical/surgical ICU of a London teaching hospital.

**Participants:** A purposive sample of ICU survivors with intensive care unit acquired weakness (ICUAW) and an ICU length of stay of >72 hours.

**Analysis:** Data analysis followed a four-stage constant comparison technique: open coding, axial coding, selective coding, and model development, with the aim of reaching thematic saturation. Peer debriefing and triangulation through a patient support group were carried out to ensure credibility.

**Main results:** Fifteen people were interviewed (with four relatives in attendance). The early rehabilitation period was characterized by episodic memory loss, hallucinations, weakness, and fatigue, making early rehabilitation arduous and difficult to recall.

Participants craved a paternalised approach to care in the early days of ICU.

The central idea that emerged from this study was recalibration of the self. This is driven by a lost sense of self, with loss of autonomy and competence; dehumanized elements

1  
2  
3 of care may contribute to this. Participants described a fractured life narrative due to  
4  
5 episodic memory loss, meaning that patients were shocked on awakening from sedation  
6  
7 by the discrepancy between their physical form and cognitive representation of  
8  
9 themselves.  
10  
11  
12

13  
14 **Conclusions:** Recovery from ICUAW is a complex process that often begins with  
15  
16 survivors exploring and adapting to a new body, followed by a period of recovering  
17  
18 autonomy. Rehabilitation plays a key role in this recalibration period, helping survivors  
19  
20 to reconstruct a desirable future.  
21  
22  
23  
24  
25  
26  
27  
28  
29  
30  
31  
32  
33  
34  
35  
36  
37  
38  
39  
40  
41  
42  
43  
44  
45  
46  
47  
48  
49  
50  
51  
52

53 **Key words:** critical care, early mobilisation, rehabilitation, patient experience, recovery,  
54 physical therapy.  
55

56 **Abstract word count:** 298  
57  
58  
59  
60

## Strengths and Limitations of this study

1. This was an exploratory qualitative grounded theory study using semi structured interviews with survivors of critical illness to explore their experience of physical rehabilitation after critical illness; the approach adopted, and the data generated provided an extremely rich source of individual experience with many consistent features.
2. A constant comparison technique of data analysis was used, and enrolment continued until thematic saturation was reached.
3. Triangulation and peer debriefing were completed to ensure credibility of the study findings that clearly resonated with an independent group of critical illness survivors.
4. The patients were all recruited from one centre, which may limit transferability of findings. Qualitative studies of this kind innately have a small sample size, however, the richness of the data produced allows deep exploration of meaning and model development and thematic saturation was also reached.
5. The variation in time to interview may be considered a limitation of this study in view of impaired recall for longer gaps, however, there was no notable difference in the richness of memories and insight provided by those interviewed at different time points. The variation in time to interview also elucidated the process of recovery over time.

## Introduction:

Rapid muscle wasting<sup>1,2</sup>, functional decline<sup>3</sup> and delirium<sup>4</sup> are common consequences of critical illness. In the long term, they can lead to prolonged periods of weaning from mechanical ventilation, disability, reduced endurance, anxiety, and depression<sup>5-9</sup>. To combat these issues mobilisation, minimising sedation and spontaneous breathing should be instigated early, with research demonstrating safety and likely efficacy<sup>10-13</sup>. Furthermore, on-going rehabilitation following discharge from critical care, and attendance at ICU follow up clinics are also advocated, although research showing direct benefit of these interventions is limited<sup>14-15</sup>.

Although implementation of early mobilisation protocols and post-ICU rehabilitation is inconsistent<sup>14,16-17</sup>, early adopters of these strategies are striving for them to become the norm<sup>12,13,18</sup>. In such centres, it is not uncommon for patients to receive active out of bed physical rehabilitation whilst receiving full mechanical ventilation, renal replacement therapy, and inotropic support<sup>18</sup>. Due to the severity of weakness that can be associated with prolonged critical illness, these rehabilitation sessions are often delivered by two or more therapists/nurses, and can require technical equipment and physical handling. It is perhaps unsurprising that pain, fatigue, weakness, anxiety, fear, lack of motivation and patient confidence are reported as barriers and reasons for cessation of early rehabilitation<sup>19, 20</sup>.

Sottile and colleagues (2015)<sup>21</sup> completed a survey of patient experience of early mobilisation in ICU concluding that patients recognized the importance of early mobilisation, but found it difficult, tiring and uncomfortable.



1  
2  
3 In spite of current enthusiasm, there is a paucity of literature exploring survivors'  
4 experience of early mobilisation and physical rehabilitation during and after a stay in ICU  
5  
6 in an in-depth manner. For the purpose of this manuscript, the term 'rehabilitation' is  
7  
8 used to encompass early mobilisation and physical rehabilitation implemented by  
9  
10 physiotherapists from admission to ICU.  
11  
12  
13  
14  
15

16 **Aim:** To explore the patient experience of recovery from critical illness, with emphasis  
17  
18 on their experience of rehabilitation, and to develop a theoretical model grounded in  
19  
20 these data.  
21  
22

23  
24 **Methods:**

25  
26  
27 **Qualitative approach and research paradigm:** Constructivist grounded theory study<sup>22</sup>  
28  
29 using semi-structured interviews with a purposive sample of adult ICU survivors.  
30  
31 Constructivism contends that individuals' views are directly influenced by their  
32  
33 experiences, and it is these individual experiences and views that shape their perspective  
34  
35 of reality. Constructivists believe that individuals have different realities that will be  
36  
37 influenced by context- this is a 'relativist' ontological stance<sup>22</sup>.  
38  
39  
40  
41  
42

43 Constructivist grounded theory is an appropriate methodology for this study because it  
44  
45 allows the researcher to develop a theoretical model to explain the data based on an  
46  
47 iterative process of data immersion, analysis and interpretation, which recognises and  
48  
49 accounts for contextual factors.<sup>22</sup>  
50  
51  
52

53 **Setting:** Participants were recruited from the adult medical/surgical ICU of a 430 bedded  
54  
55 London teaching hospital between November 2015 and September 2016.  
56  
57  
58  
59  
60

1  
2  
3 **Participants and sampling:** Participants were purposively sampled. Screening and  
4 inclusion criteria were: English-speaking, a critical stay of >72 hours, capable of providing  
5 informed consent determined using the Mental Capacity Act assessment<sup>23</sup>, anticipated  
6 to survive, aged over 18 and documented ICUAW determined via case note review (this  
7 was to ensure that the participants had exposure to rehabilitation interventions.)  
8  
9

10  
11  
12  
13  
14  
15  
16 The clinical team identified potential participants against the broad inclusion criteria  
17 stated above to ensure that it was appropriate for them to be approached by the  
18 research team. Notes were screened with the aim of purposively selecting a varied  
19 sample of participants that could speak to the breadth of emerging themes. If deemed  
20 appropriate participants were then approached by the lead researcher (EJC) and  
21 provided with written information. If they had capacity to consent and agreed to  
22 participate, written informed consent was gained. Participants that could not provide  
23 informed consent were excluded.  
24  
25  
26  
27  
28  
29  
30  
31  
32  
33  
34  
35

36 At the discretion of the participant, relatives were also invited to be present in the  
37 interview to enable exploration and elucidation of any ICU-associated memory loss. As  
38 the study progressed participants were selected to ensure a heterogeneous sample, with  
39 the aim of achieving thematic saturation<sup>22,24-26</sup>, for example, targeting varying degrees of  
40 ICUAW, different genders, and specific age categories.  
41  
42  
43  
44  
45  
46  
47  
48

49 **Ethics:** This study was granted approval by the East of England Ethics committee (REC  
50 reference number 14/EE/1027) and from the Research and Development Department at  
51 the study site.  
52  
53  
54  
55  
56  
57  
58  
59  
60

1  
2  
3 **Data collection methods:** The semi-structured interviews were conducted by EJC. For  
4  
5 reflexivity, EJC is research physiotherapist with expertise in critical care and prior training  
6  
7 in qualitative methods research. EJC also has personal experience of major injury and as  
8  
9 a close relative of an ex ICU patient. SJB is an ICU medical consultant and is involved with  
10  
11 ICU follow up clinics, and EJM is a researcher focusing on management and change in the  
12  
13 health sector, with expertise in qualitative methodology.  
14  
15  
16

17  
18 The interviews followed a topic guide designed with input from the Intensive Care  
19  
20 Society Patient and Relatives Group (Table 1). The questions in the topic guide focused  
21  
22 on the memory of the admission to ICU, any physical weakness that they encountered,  
23  
24 and patients' experience of rehabilitation in the ICU and following discharge. The  
25  
26 questions were intentionally left open to initiate reflections and to allow subsequent  
27  
28 detailed exploration of the issues that appeared important to the interviewee. The first  
29  
30 interview was used as a pilot, however, as no changes were made and those data  
31  
32 collected from this interview were rich and informative, it was retained and analysed in  
33  
34 the results.  
35  
36  
37  
38  
39

40  
41 As the study progressed and themes emerged, participants were asked to elaborate and  
42  
43 probed on specific issues in line with the constant comparison technique, for example:  
44  
45 how the perception of the physiotherapist's strength influenced their rehabilitation  
46  
47 experience; how they perceived their body now; what differences there were between  
48  
49 their current and previous physical function; how they saw their future; and what they  
50  
51 defined as physical rehabilitation.  
52  
53  
54

55  
56 The interviews were carried out either in the hospital or in the community after ICU  
57  
58 discharge. Enrolment and interviews continued until thematic saturation was reached  
59  
60

1  
2  
3 i.e. no new ideas were emerging, as per the criteria outlined by Bonde (2013)<sup>26</sup>. This was  
4  
5 to challenge the emergent model and ensure credibility. The interviews were  
6  
7 anonymised, recorded, and transcribed *verbatim* by a professional transcription  
8  
9 company. All transcripts were double-checked for accuracy by EJC.  
10  
11  
12

13  
14 All interviewees were given pseudonyms to ensure anonymity. Further demographic and  
15  
16 clinical data were also collected from the case notes: age, critical care and hospital  
17  
18 length of stay, APACHE II score, admission diagnosis, residence prior to admission, pre-  
19  
20 morbid functional level, and hospital discharge destination.  
21  
22

23  
24 **Data processing and analysis:** Transcripts were uploaded onto Nvivo® software (QSR  
25  
26 International, Doncaster, Australia) for analysis. They were read and reread by EJC to  
27  
28 ensure full immersion in the data. Memo writing was used throughout. The first stage of  
29  
30 the analysis process is 'open coding', which is the identification of primary broad  
31  
32 categories; these may be around a theme or topic, or more conceptual, such as emotion  
33  
34 or attitude. The second stage is 'axial coding'; here categories are clustered together into  
35  
36 meaningful, related groups. The third stage is 'selective coding', where core themes are  
37  
38 identified. Lastly, the themes are used to generate a theoretical framework to explain  
39  
40 the data<sup>22,24-26</sup>. Data collection and analysis occur concurrently, so that constant  
41  
42 comparison was made between emerging themes (both within and between narratives),  
43  
44 and the literature, allowing model refinement. After the fourth interview had been  
45  
46 transcribed and open coding had been completed, axial codes began to form. These  
47  
48 ideas were then discussed in detail with the research team. This was followed by a  
49  
50 dynamic process of reflection after each interview to develop and refine the axial codes  
51  
52 into selective codes until a model encompassing all elements was developed. The last  
53  
54  
55  
56  
57  
58  
59  
60

1  
2  
3 interviews were used to challenge this model and to assess for data saturation. This  
4  
5 process allowed a central phenomenon to emerge from the data<sup>22,24-26</sup>. The words used  
6  
7 for coding were based on the lead researchers interpretation and terms in related  
8  
9 literature.  
10  
11  
12

### 13 14 **Techniques to enhance trustworthiness:**

#### 15 16 17 **Peer debriefing:**

18  
19  
20 Peer debriefing was completed via in-depth discussion with SJB and EJM. This was done  
21  
22 regularly throughout the course of the study.  
23  
24

#### 25 26 **Patient and public involvement**

27  
28  
29 A patient representative from an ICU support group was consulted in the development  
30  
31 of the topic guide. An initial draft of the topic guide was developed by the research team  
32  
33 and it was then sent to the patient representative for review and modification, all of  
34  
35 their recommended changes were made. Patients and public were not involved in the  
36  
37 recruitment or conduct of the study. Participants were given the opportunity to receive  
38  
39 information on the results of the study at their request.  
40  
41  
42  
43

#### 44 45 **Triangulation**

46  
47  
48 Triangulation and sense checking was completed through presentation to an ICU  
49  
50 survivor support group with subsequent dialogue to assess the dependability,  
51  
52 confirmability and credibility of the model (this did not include interview participants).  
53

54  
55  
56 At the support group the model was presented and then there was opportunity for  
57  
58 questions and answers with the researcher (EJC). The group were then left to discuss the  
59  
60

1  
2  
3 study between themselves and feedback to the research team with any thoughts at a  
4  
5 later date to allow them to speak openly and frankly with each other. The leader of the  
6  
7 support group fed back to the research team that the participants resoundingly agreed  
8  
9 with the concepts and felt that the work '*encompassed all the areas that were important*  
10  
11 *and relevant to those who have experienced critical illness*'. The presentation also led to  
12  
13 a very tearful response from some attendees who reported to have felt 'understood'.  
14  
15  
16

### 17 18 19 **Results:**

20  
21  
22 Eleven hours of qualitative data from 15 participants (with 4 additional relatives present)  
23  
24 were collected. The *patients* are described in Table 2.  
25

26  
27  
28 *[Insert table 2: Patient demographics]*  
29

30  
31 The median ICU and hospital length of stay were 19 days (IQR 8-33) and 63 days (IQR 34-  
32  
33 107) respectively. The median time between ICU discharge and interview was 56 days  
34  
35 (IQR: 36-80). Ten (66.6%) of the interviews took place at the hospital whilst the patients  
36  
37 were still inpatients, and five (33.3%) took place after discharge in the patient's home  
38  
39 (n=2), work (n=1), or in a clinic room (n=2). The interviews lasted a median of 39  
40  
41 minutes (IQR: 28-50).  
42  
43  
44

45  
46 The central phenomenon grounded in these data was *recalibration of the self*. There  
47  
48 were two themes contributing to this temporal model of recovery: the transition '*from*  
49  
50 *prior self to current self*', and the transition '*from current self to construction of the*  
51  
52 *future self*'. When questioned about early physical function, patients recalled a  
53  
54 discrepancy at the time of recovering awareness between their *current self*, which  
55  
56 incorporates their physical dependency, fatigue, clarity of mind, and self-image, and the  
57  
58  
59  
60

1  
2  
3 mental representation of themselves, which is still consistent with their *preadmission*  
4  
5 *self*. This discrepancy seemed to be due to episodic memory loss of their admission  
6  
7 period. Additionally, patients lacked some of the cognitive requirements for prospection  
8  
9 at this point<sup>26</sup> and therefore they struggled to envisage a compelling future self. This  
10  
11 appears to lead on to a period of *recalibration*.  
12  
13  
14  
15

16 Although this central phenomenon of *recalibration* may seem distinct from the early  
17  
18 physical rehabilitation experience that was the focus of this study, it was quite the  
19  
20 opposite, with the process of *recalibration* seeming inextricably linked to the  
21  
22 rehabilitation experience. Physical independence and function are core components of  
23  
24 the concept of *self*. When physical ability deteriorates so unexpectedly, rapidly, and  
25  
26 without obvious causation (as in ICUAW) it comes as a shock to the patient blurring their  
27  
28 sense of self. Physical rehabilitation aims to improve impairments and function by  
29  
30 challenging patients' physical ability thereby, in this extreme context, inadvertently  
31  
32 challenging their self-perception as well.  
33  
34  
35  
36  
37  
38

39 This model suggests that physical rehabilitation within ICU helps patients to challenge  
40  
41 and explore their current functional level and reconcile their self-discrepancy i.e.  
42  
43 difference between their physical self and the cognitive image of themselves. The  
44  
45 process of therapy goal-setting also challenges their capacity to think about the future;  
46  
47 discussing goal setting with participants therefore elucidated the difficulties they may  
48  
49 have in constructing a compelling future to act as a motivational force.  
50  
51  
52  
53

54 The rationale and contributing themes are presented below. Supporting evidence is  
55  
56 presented in Table 3.  
57  
58  
59  
60

## ***'From prior self to current self'***

### **Episodic memory loss**

Fundamental to the patient experience of rehabilitation, and underpinning the theoretical interpretation, was patients' episodic memory loss (i.e. loss of a specific autobiographical event) of their admission to ICU, regardless of their admission background or diagnosis. In some cases this memory gap lasted weeks, with some participants unable to recall any rehabilitation sessions on ICU at all, citing their ward rehabilitation sessions as their first experiences. The first clear memory *for all* participants was a family member at the bedside. This frequently elicited a tearful response, for example, George stated: *"(my first memory on awakening) was my mother stroking my arm, saying 'Mum's here'... that was some 30 days after my admission"*. This memory loss is of paramount importance, as it made it difficult for participants to rationalise and understand their current situation.

### **Hallucinations and delusions**

All patients experienced vivid hallucinations that often involved torture and trying to escape some of the hallucinations, however, were pleasant experiences, such as a friendly dog in the ICU. Those with a history of recreational drug use seemed less shocked by hallucinations and able to rationalise their mental state, for example, John stated: *"you're pumped full of so many drugs, it doesn't surprise me that you're tripping out."* Perceived stigma influenced patients' comfort in discussing hallucinations with



1  
2  
3 staff, for example, EJC asked Tom: *“Did you tell anyone about the hallucinations at the*  
4  
5 *time?”* Tom replied: *“No... I just felt a bit silly”*.  
6  
7  
8  
9  
10

## 11 **Weakness**

12  
13  
14  
15 On awakening patients reported frustration at their inability to communicate and were  
16  
17 shocked by the severity of their weakness, as mentally they still saw themselves as  
18  
19 capable of the physical tasks they were able to do pre-admission, for example, Sasha  
20  
21 stated: *“I didn't realise I couldn't walk. I thought I could and I tried to get out of bed loads*  
22  
23 *of times, but up here I was weak (legs) and the top of my arms were weak as well. I*  
24  
25 *couldn't do it.”* Their actual *physical-self* and cognitive representation of themselves did  
26  
27 not match, for example, Sarah said: *“I just happened to catch sight of my whole body (in*  
28  
29 *the mirror) and I nearly died. I thought; ‘that doesn't resemble the person that I am’.”*  
30  
31 However, it was the psychological symptoms that were of the greatest concern to  
32  
33 patients initially, for example, Evan felt that: *“there were tubes all over the place... but*  
34  
35 *that was the least of my worries. The specialists were there, and my son. I said ‘I don't*  
36  
37 *know who that is (son)’. My son came back on the Monday, then I recognised him and*  
38  
39 *things started falling back into place.”*  
40  
41  
42  
43  
44  
45  
46  
47

## 48 **“Noxious cycle” of ICU**

49  
50  
51 Overwhelming fatigue, insomnia (due to noise and disruption), boredom and the  
52  
53 inability to concentrate were prevalent, which had a negative impact on the ability to  
54  
55 engage in both physical rehabilitation and cognitive tasks, and made many fear early  
56  
57 rehabilitation, for example, John stated: *“Physically tiring, emotionally, you're like “sh\*t,*  
58  
59  
60

1  
2  
3 *really? I've got to do it (physiotherapy) now. I haven't got any energy at all.*" Procedural  
4  
5  
6 pain was reported in only a few instances, but discomfort was problematic, for example,  
7  
8 from being 'swaddled' in blankets (John). For many this seemed to form a "noxious  
9  
10 cycle" (Figure 1).  
11  
12  
13  
14  
15  
16

### 17 **Humanisation of care**

18  
19  
20 Participants valued "humanised" care<sup>27</sup>, often remembering the staff members who  
21  
22 made them laugh and feel safe, for example, Caroline said: *"I remember one bloke, one*  
23  
24 *nurse, who- he would come in and smile, and I said 'Oh, you're always smiling. You make*  
25  
26 *me so happy'.*" Trust in the clinical team was also important; if trust was compromised  
27  
28 then it had a negative impact on participants engagement with rehabilitation. Trust  
29  
30 seemed dependent on the rapport the staff member developed with the patient,  
31  
32 including their ability to communicate honestly and to maintain patient's hope, for  
33  
34 example, Michelle stated: *"I trust him... because when Tom (physiotherapist) says*  
35  
36 *something, it's true. Everything he said was true.*" However, the staff-patient interaction  
37  
38 was not always positive, with many patients describing examples of *de-humanised*  
39  
40 *care*<sup>27</sup>. This included loss of agency: *"I feel so not free, everyone is doing what they want,*  
41  
42 *I'm like a puppet and I hate that"* (Michelle); and feeling isolated: *"I don't think I had a*  
43  
44 *voice at one point, which was probably one of the most difficult things to experience,*  
45  
46 *because you can't talk to people"* (Richard).  
47  
48  
49  
50  
51  
52  
53

54  
55 Although not related to humanisation of care, the physical attributes of staff also  
56  
57 influenced patients' rehabilitation experience, if physiotherapists looked small, young,  
58  
59  
60

1  
2  
3 and weak, then patients had less trust in their physical ability to keep them safe during  
4 rehabilitation, an example came from David: *“He (the physio) was strong of course. One*  
5  
6  
7  
8 *admires that. It’s an ability, you know; and of course, not everybody’s going to have that*  
9  
10 *ability.”*

### 14 ***‘From current self to construction of the future self’***

#### 17 **Recognising milestones to recovery and goal setting**

20 The vulnerability described by patients and relatives seemed to lead to a sense of  
21  
22  
23  
24  
25  
26  
27  
28  
29  
30  
31  
32  
33  
34  
35  
36  
37  
38  
39  
40  
41  
42  
43  
44  
45  
46  
47  
48  
49  
50  
51  
52  
53  
54  
55  
56  
57  
58  
59  
60  
The vulnerability described by patients and relatives seemed to lead to a sense of  
desired paternalism in the early days; they did not feel ready to be in control. This was  
further perpetuated by a lack of understanding of the stages of recovery, for example,  
Tom stated: *“how you are improving may not be quite so obvious to the patient”*. The  
memory loss of their admission meant that patients did not recall their acute stages of  
illness, and hence their physical decline; the weakness that they were experiencing did  
not make sense, and was often so severe that it made it difficult to envisage the next  
steps in their recovery. As a result, patients did not always recognise basic functional  
tasks as rehabilitation or indeed their achievements as progress, for example, Michelle  
stated: *“The other day the whole ward congratulated me- and even now I feel  
embarrassed – because I washed myself. I didn’t wait until now to know how to wash  
myself; I thought it was so stupid.”* Therapeutic adjuncts, such as the use of a bed bike  
or tilt table, were more commonly recalled as rehabilitation.

As patients had limited understanding of the recovery milestones early on, they wanted  
the multi-disciplinary team to set their rehabilitation goals as *“they did not know what  
goals to set”* (Jim). The main thing that kept them focused on engaging in rehabilitation

1  
2  
3 at this point was their family and loved ones, Sarah described this: "I cry a  
4  
5 lot...something helped me to keep going, an inner strength came...the kids..."  
6  
7

8  
9 Patient involvement in early goal setting was described as like "*being in a car crash and*  
10  
11 *someone asking you how you want to be cut out.*" Most patients had a 'just get on with  
12  
13 it' approach to rehabilitation. Martin: "*I just blind folded said, 'if this is what I am*  
14  
15 *supposed to do, I will do it.*" However, despite desiring early clinician-led rehabilitation,  
16  
17 all patients identified a high-level goal that aligned to the core values of who they are;  
18  
19 examples include, returning to work, going on holiday, finishing a PhD, and getting  
20  
21 married.  
22  
23  
24

25  
26 As patients progressed through the stages of recovery, they started to recognise smaller  
27  
28 functional gains as improvement and engaged more in the goal-setting and  
29  
30 rehabilitation planning process, for example, Sarah stated: "*Well, I was shocked at how*  
31  
32 *little I could do, but now, it's the other way, I'm actually shocked at how much I can do*  
33  
34 *and I am doing. It's really good.*" Their yardstick for comparison now became who they  
35  
36 were on awakening, and not who they were prior to admission; they were recalibrating.  
37  
38  
39  
40

## 41 42 **Discussion**

43  
44  
45 This work focused on exploring the experience of physical rehabilitation after critical  
46  
47 illness, however, as with inductive research, what transpired was a complex model of  
48  
49 recovery extending beyond the physical. Patients demonstrated an interruption to  
50  
51 personal narrative, a lost sense of self associated with loss of autonomy, temporary  
52  
53 desired paternalism and gave examples of accidental dehumanised care (albeit mostly  
54  
55 non-maleficent in intent). Delirium, sleep deprivation, fatigue and memory loss acted as  
56  
57  
58  
59  
60

1  
2  
3 potent mediators between the patients' physical impairments, and their ability to  
4  
5 recalibrate to their new disability, and engage in rehabilitation.  
6  
7

8  
9 It is interesting to consider these findings in the context of established psychological  
10  
11 theory. Deci & Ryan's Self-Determination Theory<sup>28,29</sup> attempts to explain why people  
12  
13 engage in goal-orientated behaviour, exploring how this leads to well-being and personal  
14  
15 growth. Its three core concepts are: *autonomy* (the ability to be in control of oneself),  
16  
17 *competence* (the ability to manage the situation they are in) and *relatedness* (the ability  
18  
19 to have an emotional connection with others). Only when these needs are met can  
20  
21 intrinsic motivation flourish. Critical illness can strip patients of *autonomy* and  
22  
23 *competence*, and perhaps for a shorter period, *relatedness*. In the initial stages of critical  
24  
25 illness, patients may be unable to communicate and talk, be unable to move easily due  
26  
27 to weakness, may have hallucinations, and be too fatigued to engage in decision making.  
28  
29 Hence, loss of *autonomy* and *competence* are key features of the patient experience.  
30  
31 *Relatedness*, which may recover earlier (or be encouraged) is of paramount importance  
32  
33 to them, and was a motivator to engage in rehabilitation.  
34  
35

36  
37 Markus and Nurius (1986) developed a theory called "The Possible Self"<sup>30</sup>. They contend  
38  
39 that humans have different cognitive representations of who we are (*current self*) and  
40  
41 who we could be (*possible self*). *Possible selves* drive behaviour. A notion of the *possible*  
42  
43 *self* helps us to assess our *current self* by creating a benchmark for comparison for self-  
44  
45 evaluation. It can also provide tangible rehabilitation goals. *The possible self* and goal  
46  
47 setting also rely heavily on temporality, therefore requiring narrative of the past, and the  
48  
49 capacity to prospect. Physiologically, prospection depends on episodic memory,  
50  
51  
52  
53  
54  
55  
56  
57  
58  
59  
60

1  
2  
3 prospective memory, emotional stability and hypothetical thinking<sup>31</sup>, some of which can  
4  
5 be impaired in critical illness due to sleep deprivation, fatigue and delirium.  
6  
7

8  
9 On awakening, patients' immediate cognitive representation of their *current self*  
10  
11 matched their pre-admission self because they do not remember their functional  
12  
13 decline, however, their body had changed. Their mental image of their *current self* and  
14  
15 their *physical self* were not aligned. Furthermore, patients could not remember the  
16  
17 totality of their past, they did not recognise their present, and they struggled to  
18  
19 construct a compelling future self. This impaired their ability to engage in rehabilitation  
20  
21 goal setting and led to a sense of vulnerability, desired paternalism and emphasis on  
22  
23 *relatedness*.  
24  
25  
26  
27

28  
29 This model of *recalibration* ties these established psychological ideas together, reflecting  
30  
31 the need for patients to explore their new self, adapt to it and allow it to become their  
32  
33 new yardstick. When this was achieved, smaller milestones in recovery became  
34  
35 meaningful goals. Others have described similar concepts as a *liminal* state. Liminality is  
36  
37 an anthropological term from the Latin word *līmen*, meaning threshold<sup>32</sup>. It refers to  
38  
39 someone who is transitioning. It is often associated with a change in role/identity, or a  
40  
41 loss of one self to be replaced with another. This can create inner turmoil, especially if  
42  
43 that change is not invited.  
44  
45  
46  
47

48  
49 This idea of liminality in ICU has been touched upon by a number of authors<sup>32-35</sup>. Kean  
50  
51 and colleagues<sup>32</sup> identified 'unscheduled status passage' from *prior self* to *critically ill self*  
52  
53 as a theme in a longitudinal study of ICU survivorship. They found that this unscheduled  
54  
55 liminal stage is worsened by memory loss and delirium, and that this process of change  
56  
57  
58  
59  
60

1  
2  
3 is temporal in nature, both progressing and regressing (in the event of decline). In order  
4  
5 to move on, patients need to regain autonomy.  
6  
7

8  
9 Lindberg and colleagues<sup>35</sup> described what recovering autonomy looks like, suggesting  
10  
11 that patients go through four stages: the first is to acknowledge their dependence (or  
12  
13 paternalism), and then they strive to be recognised as a person (“humanised” care).  
14  
15 These two stages echo the findings of this study. The latter two stages are ‘invited  
16  
17 participation in care’, and ‘becoming a co-partner in the decision-making’. These stages  
18  
19 describe how staff coach patients to take control again through mutual trust,  
20  
21 understanding and co-determination.  
22  
23  
24

25  
26 Although these may seem like abstract concepts, it is the authors’ view that they have  
27  
28 direct relevance to clinical practice, especially as early rehabilitation becomes a key  
29  
30 aspect of acute care. The reason for this is that perception of self and engagement in  
31  
32 rehabilitation and goal-setting are inextricably linked.  
33  
34  
35

36  
37 If a person’s mind is telling them one thing about who they are and what they are  
38  
39 capable of doing, and their body is telling them another, they cannot start thinking about  
40  
41 the future until they reconcile that difference. They cannot reconcile that difference with  
42  
43 delirium, hallucinations and lack of episodic memory to justify their current situation and  
44  
45 facilitate hypothetical thinking and prospection<sup>31</sup>. Combining psychological intervention  
46  
47 with physiotherapy intervention may help to address this.  
48  
49  
50

51  
52 Goal-setting depends on the capacity to prospect. It is also a key recommendation in the  
53  
54 UK National Institute for Health and Care Excellence (NICE) Guidelines for Rehabilitation  
55  
56 after Critical Illness<sup>36</sup> and NICE Quality Standards<sup>37</sup>. The Quality Standards state that  
57  
58  
59  
60

1  
2  
3 rehabilitation goals should be set within 4 days of admission, and ideally should be  
4 patient-agreed. These data would suggest that asking *patients* to set goals at day 4 may  
5  
6 be premature. Further research exploring the application of the model of recovering  
7  
8 autonomy described by Lindberg<sup>35</sup> may assist in tailoring rehabilitation guidelines to the  
9  
10 specific needs of the critically ill.  
11  
12  
13  
14

15  
16 Further focus on *how* rehabilitation is delivered, not just *what* is delivered could also be  
17  
18 instructive. The impact of the dynamic between a sports coach and the players is well  
19  
20 known, yet this coaching dynamic is neglected somewhat in ICU rehabilitation. If  
21  
22 clinicians are able to assist patients in recalibrating to their *new current self*, and the  
23  
24 reconstruction of a compelling *future self*, it may improve patient care and outcome.  
25  
26 Further research will be needed to confirm the concepts identified in this initial  
27  
28 exploratory study. However, we believe the concepts identified are sufficiently plausible  
29  
30 and robust to pose challenges to clinicians working with recovering critically ill patients  
31  
32 (outlined in Box 1).  
33  
34  
35  
36  
37  
38

39 **Box 1: Key observations and challenges to practice.**

40  
41 **Key observations**

- 42  
43 ❖ Patients recovering consciousness during or after a critical illness are likely to be  
44 shocked by the transition through which they have gone. Part of that shock is the  
45 due to the unplanned interruption of their autobiographical story.  
46  
47 ➤ How can you help to fill the gaps in autobiographical memory?  
48  
49  
50  
51  
52 ❖ Patients' immediate memory is of who they were and what they were able to do  
53 before their critical illness. This is in collision with what they can actually do and a  
54 period of recalibration is needed to allow people to align the two and develop  
55 reasonable ambitions and goals.  
56  
57 ➤ How can you support patients to explore their current function and settle the  
58  
59  
60



1  
2  
3  
4  
5  
6  
7  
8  
9  
10  
11  
12  
13  
14  
15  
16  
17  
18  
19  
20  
21  
22  
23  
24  
25  
26  
27  
28  
29  
30  
31  
32  
33  
34  
35  
36  
37  
38  
39  
40  
41  
42  
43  
44  
45  
46  
47  
48  
49  
50  
51  
52  
53  
54  
55  
56  
57  
58  
59  
60

discrepancy between expectations and reality?

- ❖ This recalibration is the development of an understanding of the relationships between their past, present and possible futures selves.
  - How can you help patients to envisage a compelling future?
- ❖ Because of this need for recalibration along with delirium and impaired cognition patients may need, and wish for, assistance in planning early rehabilitation. As autonomy recovers, patients desire to become fully involved increases.
  - How can you recognise and support recovering autonomy?
- ❖ Motivation and engagement are crucial in maximising the benefits of rehabilitation. Leveraging human relationships (relatedness) and encouraging autonomy are likely to be helpful; care that is de-humanising, even if “efficient” is likely to impair recovery.
  - How can humanisation of care be optimised in your ICU?

**Acknowledgements:** Thanks to Dr Cherry Kilbride and Dr William Young (Brunel University London) for their input into the theoretical interpretation of these data. Thank you to Gordon Sturmey and the ICU support network in Reading for their involvement and support with the study.

**References:**

1. Puthuchery ZA, Rawal, JR, McPhail M, Connolly B, Ratnayake G, Chan P, Hopkinson NS, Phadke R, Dew T, Sidhu PS, Velloso C, Seymour A, Agley CC, Selby A, Limb M, Edwards LM, Smith K, Rowlerson A, Rennie MJ, Moxham J, Harridge S, Hart N, Montgomery HE. Acute Skeletal Muscle Wasting in Critical Illness. *JAMA*, 2013; 310 (15), 1591-1600.
2. Friedrich O, Reid MB, Van den Berge G, Vanhorebeek I, Hermans G, Rich MM, Larsson L. The sick and the weak: Neuropathes/myopathies in the critically ill. *Physiol Rev*. 2015; 95 (3), 1025-109.
3. Hermans G, & Van den Berghe G. Clinical review: intensive care unit acquired weakness. *Crit Care*. 2015; 5 (19), 274.
4. Cavalazzi R, Saad M, Marik PE. Delirium in the ICU: an overview. *Ann Intensive Care*. 2012; 2 (49).
5. Kress JP & Hall JB. Intensive care unit acquired weakness and recovery from critical illness. *N Eng J Med*. 2014; 370, 1626-1635.
6. Cuthbertson BH, Elders A, Hall S, Taylor J, MacLennan G, MacKirdy F, Mackenzie SJ, and the Scottish Critical Care Trials Group and the Scottish Intensive Care Society Audit Group. Mortality and quality of life in the five years after severe sepsis. *Critical Care*. 2013; 17, R70.
7. Kaukonen K-M, Bailey M, Suzuki S, Pilcher D, Bellomo R. Mortality related to severe sepsis and septic shock among critically ill patients in Australia and New Zealand, 2000-2012. *JAMA*. 2014; 311 (13), 1308-1316.
8. Hill AD, Fowler RA, Pinot R, Herridge MS, Cuthbertson BH, Scales DC. Long-term outcomes and healthcare utilization following critical illness – a population-based study. *Critical Care*. 2016; 20, 76.
9. Pandharipande P, Girard TD, Jackson JC, Morandi A, Thompson JL, Pun NE, Brummel CG, Highes EE, Vasilevskis AK, Shintani KG, Moons SK, Geevaghese A, Canonico RO, Hopkins RO, Bernad GR, Dittus RS, Ely EW. Long-Term Cognitive Impairment after Critical Illness. *N Engl J Med*. 2013: 369, 1306-1316.
10. Nydahl P, Sricharoenchai T, Chandra S, Kundt FS, Huang M, Fischill M., Needham D.M. Safety of Patient Mobilization and Rehabilitation in the Intensive Care Unit.

- 1  
2  
3 Systematic Review with Meta-Analysis. *Annals of the American Thoracic Society*.  
4 2017; 14 (5).  
5  
6  
7 11. Castro-Avila AC, Seron P, Fan E, Gaete M, Mickan S. (2015) Effect of early  
8 rehabilitation during Intensive Care Unit stay on functional status: systematic review  
9 and meta-analysis. *PLoS ONE*. 2015; 10 (7), e0130722.  
10  
11 12. Balas MC, Burke WJ, Gannon D, Cohen MZ, Colburn L, Bevil C, Franz D, Olsen KM, Ely  
12 WE, Vasilevski EE (2013) Implementing the awakening and breathing coordination,  
13 delirium monitoring/management, and early exercise/mobility bundle into everyday  
14 care: opportunities, challenges, and lessons learned from implementing the ICU  
15 pain, agitation and delirium guidelines. *Crit Care Med*. 2013; 41: S116-S127.  
16  
17 13. Balas MC, Vasilevskis EE, Olsen KM, Schmid KK, Shostrum V, Cohen MZ, Peitz G,  
18 Gannon DE, Sisson J, Sullivan J, Stohtert JC, Lazure J, Nuss SL, Jawa RS, Freihurt F, Ely  
19 EW, Burke WJ. (2014) Effectiveness and safety of the awakening and breathing  
20 coordination, delirium monitoring/management, and early exercise/mobility bundle.  
21 *Crit Care Med*. 2014; 42:1024-1036.  
22  
23 14. Connolly B, Douiri A, Steier J, Moxham J, Denehy L, Hart N. A UK survey of  
24 rehabilitation following critical illness: implementation of NICE Clinical Guidance 83  
25 (CG83) following hospital discharge. *BMJ Open*. 2014; 4; e004963.  
26  
27 15. Jensen JF, Thomsen T, Overgaard D, Bestle MH, Christensen D, Egerod I. Impact of  
28 follow-up consultations for ICU survivors on post-ICU syndrome: a systematic review  
29 and meta-analysis. *Intensive Care Med* (2015) 41:763–775  
30  
31 16. Nydahl P, Parker RA, Bartoszek G, Dubb R, Filipovic,S, Flohr H-J, Kaltwasser A, Mende  
32 H, Rothaug O, Schuchhardt D, Schwabbauer N, Needham D. Early Mobilization of  
33 Mechanically Ventilated Patients: A 1-Day Point-Prevalence Study in Germany.  
34 *Critical Care Medicine*. 2014; 42 (5), 1178-1186.  
35  
36 17. Berney SC, Rose JW, Bernhardt J, Denehy L, Prospective observation of physical  
37 activity in critically ill patients who were intubated for more than 48 hours. *Journal*  
38 *of Critical Care*. 2015; 30(4), 658-663.  
39  
40 18. Hodgson CL, Stiller K. Needham D, Tipping CJ, Harrold M, Baldwin CE, Bradley S,  
41 Berney S, Caruana LR, Elliott D, Green M, Haines K, Higgins AM, Kaukonen KM,  
42 Leditschke IA, Nickels MR, Paratz J, Patman S, Skinner EH, Young PJ, Zanni JM,  
43 Denehy L, Webb SA. Expert consensus and recommendations on safety criteria for  
44  
45  
46  
47  
48  
49  
50  
51  
52  
53  
54  
55  
56  
57  
58  
59  
60

- 1  
2  
3 active mobilisation of mechanically ventilated critically ill patients. *Critical Care*.  
4 2014; 16:658.  
5  
6  
7 19. Parry S, Knight LD, Connolly B, Baldwin C, Puthuchery Z, Morris P, Mortimore J, Hart  
8 N, Denehy L, Granger CL. Factors influencing physical activity and rehabilitation in  
9 survivors of critical illness: a systematic review of quantitative and qualitative  
10 studies. *Intensive Care Med*. 2017; 43, 531–542.  
11  
12  
13  
14 20. Wright SE, Thomas K, Watson G, Baker C, Bryant A, Chadwick, TJ, Shen J, Wood R,  
15 Wilkinson J, Mansfield L, Stafford V, Wade C, Furneal J, Henderson A, Hugill K,  
16 Howard P, Roy A, Bonner S, Baudouin S. Intensive versus standard physical  
17 rehabilitation therapy in the critically ill (EPICC); a multicentre, parallel-group,  
18 randomised controlled trial. *Thorax*. 2017; (5).  
19  
20  
21  
22  
23 21. Sottile PD, Nordon-Craft A, Malone D, Schenkman M, Moss M. Patient and family  
24 perceptions of physical therapy in the medical intensive care unit. *Journal of Critical*  
25 *Care*. 2015; 30, 891-895.  
26  
27  
28  
29 22. Mills, J., Bonner, A., Francis, K. (2006) The development of constructivist grounded  
30 theory. *International Journal of Qualitative Research Methods*. 5 (1).  
31  
32  
33 23. Mental Capacity Act (2005). UK legislation. Available at:  
34 <https://www.legislation.gov.uk/ukpga/2005/9/contents>  
35  
36  
37 24. Corbin, J. & Strauss, A. (2015) *Basics of qualitative research: techniques and*  
38 *procedures for developing grounded theory*. 4th edition. London  
39  
40  
41 25. Heath H, Cowley S. Developing a grounded theory approach: a comparison of Glaser  
42 and Straus. *International Journal of Nursing Studies*. 2004; 41, 141-150.  
43  
44 26. Bonde, D. (2013) *Qualitative Interviews: When enough is enough*. Research by  
45 Design.  
46  
47 27. Todres L, Galvin KT, Holloway I. The humanisation of healthcare: a value framework  
48 for qualitative research. *International Journal of Qualitative Studies on Health and*  
49 *Well-being*. 2009; 4, 68-77.  
50  
51  
52 28. Deci EL, Ryan RM. *Intrinsic motivation and self-determination in human behavior*.  
53 New York, NY: Plenum. 1985.  
54  
55  
56 29. Deci EL, Ryan RM. (2017) <http://selfdeterminationtheory.org/theory/> (Accessed:  
57 30th March 2017)  
58  
59  
60 30. Markus H & Nurius P. Possible Selves. *American Psychologist*. 1986; 41 (9), 954-969

- 1  
2  
3 31. Osman M. What are the essential cognitive requirements for prospection (thinking  
4 about the future)? *Frontiers in Psychology*. 2014;5, 626.  
5  
6  
7 32. Kean S, Salisbury LG, Rattray J, Walsh TS, Huby G, Ramsey, P. 'Intensive Care Unit  
8 (ICU) Survivorship' – a constructivist grounded theory of surviving critical illness.  
9 *Journal of Clinical Nursing*. 2017. [online].  
10  
11  
12 33. Johnston LB. Surviving Critical Illness: A Case Study in Ambiguity. *Journal of Social  
13 Work in End-of-Life & Palliative Care*. 2011; 7 (4), 363-382.  
14  
15  
16 34. Darbyshire JL, Greig PR, Vollaam S, Young DJ, Hinton L. "I Can Remember Sort of Vivid  
17 People... but to Me They Were Plasticine." *Delusions on the Intensive Care Unit:  
18 What Do Patients Think is Going on?* *PLoS ONW*; 11 (4): e0153775.  
19  
20  
21 35. Lindberg C, Sivberg B, Willman A, Fagerstrom C. A trajectory towards partnership in  
22 care – patients perspective of autonomy in intensive care: A qualitative study.  
23 *Intensive and Critical Care Nursing*. 2015;31: 294-302.  
24  
25  
26  
27 36. National Institute for Health and Clinical Excellence. Great Britain. *Rehabilitation  
28 After Critical Illness* Great Britain. Available at: [www.nice.org.uk](http://www.nice.org.uk). 2009.  
29  
30  
31 37. National Institute for Health and Clinical Excellence (2017). *Rehabilitation after  
32 Critical illness in adults: Quality Standard*. Published 7th September 2017. Available  
33 online: [nice.org.uk/guidance/qs158](http://nice.org.uk/guidance/qs158). (Accessed: 13th September 2017)  
34  
35  
36  
37  
38  
39  
40  
41  
42  
43  
44  
45  
46  
47  
48  
49  
50  
51  
52  
53  
54  
55  
56  
57  
58  
59  
60

**Topic guide****Opening**

1. Introduction
2. Consent confirmed.

**Questions**

3. Do you have any questions about the about the patient information sheet?
4. Could you tell me about the events leading up to your admission to the ICU?
5. Could you summarize, as you remember it, your stay on the ICU including the length of your stay and the procedures you experienced (e.g. surgery, tracheostomy etc)?
6. Could you describe any physical problems that you had during and after your stay, such as weakness, pain, joint stiffness etc?
7. Could you describe your rehabilitation experience?
  - Memories of rehabilitation
  - Rehabilitation equipment
  - Interaction with the therapist
  - Intensity of rehabilitation
  - Rehabilitation goal setting

**Closing**

8. Do you have any additional information you would like to add?
9. Do you have any questions?

**End****Table 1: Topic guide**

Table 2: Summary of each participant

| Pseudonym    | Relative present? | Age range (years) | APACHE II | Diagnosis                                           | Length of stay, ICU (days) | Length of stay, hospital (days) | Discharge location                                         |
|--------------|-------------------|-------------------|-----------|-----------------------------------------------------|----------------------------|---------------------------------|------------------------------------------------------------|
| Richard      | No                | 30-39             | 17        | Acute porphyria                                     | 9                          | 102                             | Long-term, inpatient rehabilitation                        |
| Martin       | No                | 30-39             | 14        | Drug overdose, aspiration pneumonia, rhabdomyolysis | 26                         | 32                              | Home, outpatient rehabilitation                            |
| Sadiq        | No                | 50-59             | 22        | Exacerbation of COPD                                | 33                         | 34                              | Home, full care package                                    |
| Sarah        | No                | 60-69             | 24        | Open hernia repair- post operative MOF              | 115                        | 197                             | Long-term, inpatient rehabilitation                        |
| Tom          | No                | 60-69             | 10        | Pneumonia and pulmonary embolism                    | 10                         | 16                              | Home, outpatient rehabilitation                            |
| Evan         | No                | 60-69             | 15        | Acute bowel obstruction- colon cancer               | 5                          | 48                              | Home, no rehabilitation.                                   |
| Sasha        | Yes, daughter     | 50-59             | 10        | Neuromyelitis optica                                | 19                         | 98                              | Long-term, inpatient rehabilitation                        |
| John         | No                | 40-49             | 27        | Influenza                                           | 33                         | 71                              | Long-term, inpatient rehabilitation                        |
| George       | No                | 50-59             | 12        | Drug overdose- respiratory failure                  | 25                         | 36                              | Home, no rehabilitation                                    |
| Michelle     | No                | 80-89             | 14        | Exacerbation of COPD                                | 6                          | 42                              | Declined inpatient rehabilitation- home, full care package |
| Jim (M)      | Yes, wife         | 50-59             | 11        | Food poisoning- MOF                                 | 10                         | 18                              | Home, no rehabilitation                                    |
| Matthew (M)  | No                | 70-79             | 18        | Hospital acquired pneumonia- fractured NOF          | 5                          | 178                             | Nursing home                                               |
| Caroline (F) | Yes, husband      | 70-79             | 22        | Anterior resection for bowel cancer                 | 13                         | 63                              | Short-stay, inpatient rehabilitation.                      |
| Ben (M)      | No                | 40-49             | 15        | Drug overdose                                       | 65                         | 107                             | Home, care package                                         |
| David (M)    | Yes, wife present | 63                | 21        | Influenza                                           | 150                        | 232                             | Long-term, inpatient rehabilitation                        |

1  
2  
3  
4  
5  
6  
7 (NOF-neck of femur; MOF-multi-organ failure; COPD-chronic obstructive pulmonary disease; APACHE II- acute  
8 physiology and chronic health evaluation II; ICU – Intensive Care Unit)  
9  
10  
11  
12  
13  
14  
15  
16  
17  
18  
19  
20  
21  
22  
23  
24  
25  
26  
27  
28  
29  
30  
31  
32  
33  
34  
35  
36  
37  
38  
39  
40  
41  
42  
43  
44  
45  
46  
47  
48  
49  
50  
51  
52  
53  
54  
55  
56  
57  
58  
59  
60

For peer review only



**Table 3:** Supporting data

| <b>Central phenomenon: Recalibration of The Self</b>                                                                                                                                                                                                                                                                                                                                                                                                         |                                                                                                                                                                                                                                                                                                                                                                                                                                                                                                                                                                                                                                                                                                                                                                                                                                                                                     |
|--------------------------------------------------------------------------------------------------------------------------------------------------------------------------------------------------------------------------------------------------------------------------------------------------------------------------------------------------------------------------------------------------------------------------------------------------------------|-------------------------------------------------------------------------------------------------------------------------------------------------------------------------------------------------------------------------------------------------------------------------------------------------------------------------------------------------------------------------------------------------------------------------------------------------------------------------------------------------------------------------------------------------------------------------------------------------------------------------------------------------------------------------------------------------------------------------------------------------------------------------------------------------------------------------------------------------------------------------------------|
| <b>Main theme 1: "From prior self to current self"</b>                                                                                                                                                                                                                                                                                                                                                                                                       |                                                                                                                                                                                                                                                                                                                                                                                                                                                                                                                                                                                                                                                                                                                                                                                                                                                                                     |
| <p><i>Sasha: "I didn't realize I couldn't walk. I thought I could and I tried to get out of bed loads of times, but up here I was weak (legs) and the top of my arms were weak as well. I couldn't do it."</i></p> <p><i>Sarah: "I don't ever look at myself in the mirror and there is a mirror in that bathroom, I just happened to catch sight of my whole body almost and I nearly died. I thought; that doesn't resemble the person that I am."</i></p> |                                                                                                                                                                                                                                                                                                                                                                                                                                                                                                                                                                                                                                                                                                                                                                                                                                                                                     |
| <b>Episodic memory loss</b>                                                                                                                                                                                                                                                                                                                                                                                                                                  | <p><b>ICU admission</b></p> <p>Sasha: "...that's when I don't know, it's a real black after that (the emergency room)"</p> <p>Sadiq: "That is a black. That is a blank. Totally blank"</p> <p>John: "I must have been in and out of consciousness, because I don't remember anything"</p> <p>Ben: " I had a bad fall, collapsed... that's all I remember"</p> <p><b>Rehabilitation and mobilization</b></p> <p>EJC: "what was your memory of getting moving after you woke up with the tubes attached?" Ben: "I don't really have much memory of it."</p> <p>EJC: Do you remember any of the rehab on ICU?" Martin: "Not to start with, no."</p> <p>David: "It was Dan (ward physiotherapist) who taught me to sit on the edge of the bed."</p> <p>EJC: "Do you remember getting into the chair for the first time?" Michelle: "It was with Tom (the ward physical therapist)."</p> |
| <b>Hallucinations and delusions</b>                                                                                                                                                                                                                                                                                                                                                                                                                          | <p>John: "I kept thinking I could see like people with hoodies and they were like assassins, trying to get in."</p> <p>David: "I was taken into Soho (Central London) by some people and stuck under a glass floor, lying under a glass floor with formaldehyde around me. I was encased."</p> <p>Ben: "I operated on Margaret Thatchers cat and there was eight other people in the house and three of them got shot... I remember waking up with the fear that I was going to get shot."</p> <p>Carolyn: "I was trying to use my mobile (to escape), and the same number kept on pressing and I remember panicking"</p>                                                                                                                                                                                                                                                           |

|                                                                                                                                                                                                                                                                                                                                                                                                                                                                                                                                                                                                                                                                                                                                                                                                                |                                                                                                                                                                                                                                                                                                                                                                                                                                                                                                                                                                                                                                                                                                                                                                                                                                                                                                                                                                                                                                                                   |
|----------------------------------------------------------------------------------------------------------------------------------------------------------------------------------------------------------------------------------------------------------------------------------------------------------------------------------------------------------------------------------------------------------------------------------------------------------------------------------------------------------------------------------------------------------------------------------------------------------------------------------------------------------------------------------------------------------------------------------------------------------------------------------------------------------------|-------------------------------------------------------------------------------------------------------------------------------------------------------------------------------------------------------------------------------------------------------------------------------------------------------------------------------------------------------------------------------------------------------------------------------------------------------------------------------------------------------------------------------------------------------------------------------------------------------------------------------------------------------------------------------------------------------------------------------------------------------------------------------------------------------------------------------------------------------------------------------------------------------------------------------------------------------------------------------------------------------------------------------------------------------------------|
| <p><b>Weakness</b></p>                                                                                                                                                                                                                                                                                                                                                                                                                                                                                                                                                                                                                                                                                                                                                                                         | <p>George: "Nothing, I couldn't move my hand. I couldn't move and that was really scary. Really scary."</p> <p>Richard: " I couldn't do anything. I was paralyzed from the neck down... I still felt like I had sensation in my legs and my arms, I just couldn't move them."</p> <p>Carolyn: "I couldn't even stand up. I was really very, very weak."</p> <p>John: "I couldn't do anything. I mean literally, I couldn't move, I could just barely move my fingers."</p> <p>David: "I couldn't move. I couldn't move at all. I could blink, that's about it."</p> <p>Martin: "...couldn't walk, couldn't do nothing."</p> <p>Richard: "You are reliant entirely on the people around you, for everything really... that's difficult."</p>                                                                                                                                                                                                                                                                                                                       |
| <p><b>Noxious cycle of ICU</b></p>                                                                                                                                                                                                                                                                                                                                                                                                                                                                                                                                                                                                                                                                                                                                                                             | <p>Sarah: "I didn't want to do it (physiotherapy). I used to dread them coming, any excuse to get out of it. I was just so tired."</p> <p>John: "Physically tiring, emotionally... you're like 'sh*t really? I've got to do it (mobilization) now? I haven't got any energy at all.'"</p> <p>George: "There were some days when they'd (physiotherapist) come and they'd get me into the chair, and they'd want to do some work on the zimmer frame. They'd come back (from getting the zimmer frame) and I'd be asleep."</p> <p>Sarah: "People kept telling me to read, but I couldn't. I couldn't' actually physically read. They'd bring me the menu and I just couldn't do it, and then I'd fall asleep"</p> <p>Sarah: "...then I just accepted it (weakness), going...on the hoist and, you lose all dignity when you're in that state you just accept it, and you just let them help you as much as possible and when you've done your, you know bits of physio, exhausted, you go back to bed again, sleep again. You know it tended to be like that."</p> |
| <p style="text-align: center;"><b>Main theme 2: "From current self to construction of the future self"</b></p> <p>Ben: <i>"The first days when I couldn't move... I was disillusioned with the whole thing, and I thought, 'This is never going to work'... I couldn't see how anything could turn round, but I was told just to trust. But that period was very difficult because when you don't see any light at the end of the tunnel, it's difficult to sort of engage with it, and it's difficult to trust... There was plans in my head, but it's difficult to kind of have them if you think it's just a waste of time what you're doing. Now I know that there is (light at the end of the tunnel)... and I believe I'll be walking next week, they've (physiotherapists) let me believe that"</i></p> |                                                                                                                                                                                                                                                                                                                                                                                                                                                                                                                                                                                                                                                                                                                                                                                                                                                                                                                                                                                                                                                                   |

1  
2  
3  
4  
5  
6  
7  
8  
9  
10  
11  
12  
13  
14  
15  
16  
17  
18  
19  
20  
21  
22  
23  
24  
25  
26  
27  
28  
29  
30  
31  
32  
33  
34  
35  
36  
37  
38  
39  
40  
41  
42  
43  
44  
45  
46  
47  
48  
49  
50  
51  
52  
53  
54  
55  
56  
57  
58  
59  
60

**Recovery milestones and goal setting**

Matthew: "Let the patient realize that he is not capable of doing that, or this, or whatever... don't tell him"

Tom: "Everyone's functions, and how they are improving, might not be quite so obvious to the patient."

Carolyn: "The other day the whole ward congratulated me- and even now I feel embarrassed – because I washed myself. I didn't wait until now to know how to wash myself; I thought it was so stupid."

Jim's wife: "We didn't want to set the goals, because we didn't know what goals to set"

Sadiq: "It depends on the person. If a person is shooting to the high, they might do it (achieve their goal), but sometimes shooting too much to the high might break your neck. If they are too sick, they cannot talk, you are in the dark and you have to put your own objectives."

Researcher: "What have been the things that have kept you going?" Sasha: "I think Gemma (daughter) and her dad, they've been so supportive. He's been down every day, and Gemma sometimes twice a day \*starts crying\*... sorry... I suppose if it wasn't for them, I wouldn't be... \*crying- unable to finish sentence\*

Richard: "obviously I was doing it (rehab) for me primarily, but knowing how much concern and love she has for me, and knowing how much it would mean to her and how much of a relief it would be to her... The fact that she was, you know with me for as long as she was, and as strong as she was... I don't know. I never thought my mum was that strong."

1  
2  
3 Figure legends  
4  
5

6 **Figure 1: The noxious cycle of critical illness.**  
7  
8  
9  
10  
11  
12  
13  
14  
15  
16  
17  
18  
19  
20  
21  
22  
23  
24  
25  
26  
27  
28  
29  
30  
31  
32  
33  
34  
35  
36  
37  
38  
39  
40  
41  
42  
43  
44  
45  
46  
47  
48  
49  
50  
51  
52  
53  
54  
55  
56  
57  
58  
59  
60

For peer review only

1  
2  
3  
4  
5  
6  
7  
8  
9  
10  
11  
12  
13  
14  
15  
16  
17  
18  
19  
20  
21  
22  
23  
24  
25  
26  
27  
28  
29  
30  
31  
32  
33  
34  
35  
36  
37  
38  
39  
40  
41  
42  
43  
44  
45  
46  
47  
48  
49  
50  
51  
52  
53  
54  
55  
56  
57  
58  
59  
60



Figure 1: noxious cycle of ICU
